1

## 2 Production the industrial levels of bioethanol from glycerol by engineered 3 yeast "Bioethanol-4<sup>th</sup> generation"

4

5 Besides the pledges for expanding uses of biofuels to sustain the humanosphere, abruptly massive  
6 needs emerged for sanitizers with turns COVID-19 to a pandemic. Therefore, ethanol is topping the  
7 social-demanding, although the three generations of production, from molasses/starch,  
8 lignocelluloses, and algae. Owing to the limited-availability of fermentable sugars from these  
9 resources, we addressed glycerol as a fourth bio-based carbon resource from biodiesel, soap, and  
10 fatty acid industries, which considers as a non-applicable source for bioethanol production. Here, we  
11 show the full strategy to generate efficient glycerol fermenting yeast by innovative rewriting the  
12 oxidation of cytosolic nicotinamide-adenine-dinucleotide (NADH) by O<sub>2</sub>- dependent dynamic  
13 shuttle while abolishing glycerol biosynthesis route. Besides, imposing a vigorous glycerol-oxidative  
14 pathway, the engineered strain demonstrated a breakthrough in conversion efficiency (up to 98%).  
15 Its capacity extending to produce up to 90g /l ethanol and > 2 g l<sup>-1</sup> h<sup>-1</sup>, which promoting the industrial  
16 view. Visionary metabolic engineering here provides horizons for further tremendous economic and  
17 health benefits with assuring for its enhancing for the other scenarios of biorefineries.

18 **Summary:** Efficiently fermenting glycerol in yeast was developed by comprehensive engineering  
19 the glycerol pathways and rewriting NADH pathways.

20

21 One of the challenges for sustaining the future humanosphere is producing adequate bio-  
22 based chemicals and fuels from renewable resources with the footprint toward reducing  
23 greenhouse gas emissions. The paradigm of using advanced sciences with metabolic engineering

24 and biotechnologies for apt emerging needs of biofuels, materials, and chemicals has been  
25 envisioned and created on a commodity scale<sup>1-3</sup>. An abruptly massive needs in ethanol arose for  
26 medical uses as sanitizers, with turns COVID-19 to a pandemic; it had confirmed the efficiencies  
27 of 62-71% of ethanol for deactivating infection of the viruses' attached to the hands and ward-off  
28 the infectious germs on persistent inanimate surfaces like metal, glass, and plastic<sup>4</sup>. Baker's yeast  
29 (*Saccharomyces cerevisiae*), has several superior characteristics such as the ancient history with  
30 the safety of use, unicellular structure, short life cycle, distinguished powers of fermentation,  
31 robustness against inhibitors, stress-tolerance during different industrial levels of production,  
32 global infrastructures for production of bioethanol from starch and molasses, and the availability  
33 the toolboxes of genetic recombination. Besides, it is subjecting to the adaptive evolutions or  
34 even the hybridization, thence a Baker's yeast had appointed as a top model platform of microbial  
35 cell factories for several biotechnological applications<sup>5-7</sup>. The first generation of bioethanol  
36 globally has successfully established with its uses for blending with gasoline as transportation  
37 biofuel. Owing to environmental, political, security, bio-economic issues, the demanding for  
38 bioethanol increases, although the resources for fermentation limited and the attempts are still  
39 enduring of overcoming the drawbacks of application of second and third generation of  
40 bioethanol from lignocellulosic biomass and the algae; basically, through evolving the maximum  
41 efficiencies in ethanol production during xylose fermentation with glucose or even coupled to  
42 acetic acid<sup>8-12</sup>.

43 In the last decade, glycerol producing industries, especially biodiesel, have expanded and  
44 accumulated substantial quantities of glycerol, which led to dropping its price<sup>13</sup>. Although the  
45 reductive merit in glycerol (C<sub>3</sub>H<sub>8</sub>O<sub>3</sub>) higher than other fermentable sugars<sup>14</sup>, glycerol is classifying  
46 as a non-fermentable carbon in the native *S. cerevisiae*<sup>5</sup>, besides, it is used poorly as feedstock,

47 mainly through the glycerol 3-phosphate pathway, referred to as G3P pathway here, which  
48 composed of glycerol kinase (GUT1), and FAD-dependent-mitochondrial-glycerol-3-phosphate-  
49 dehydrogenase (GUT2)<sup>15</sup>. Conversely, yeast biosynthesizes glycerol for mitigating the osmotic stress  
50 and optimize the redox balance<sup>16</sup>, with subjection to the repression and transcriptional regulation of  
51 glucose through respiratory factors (RSF), and GUT1 and GUT2 genes<sup>17-20</sup>. The importance of  
52 glycerol as a carbon source, which could be utilized by yeast cells, has recognized. It promoted a  
53 study of the relationship between the molecular inheritance and the physiology of glycerol uptake  
54 and its metabolism. This study revealed a high interspecies diversity ranged from the good-glycerol  
55 grower to negative-glycerol grower in 52 of *S. cerevisiae* strains on a synthetic medium without  
56 supporting supplements and that the glycerol growth phenotype is a quantitative trait. It has  
57 confirmed that GUT1 is one of these genetic loci that sharing glycerol growth phenotype in one of  
58 these good-glycerol grower strains, a haploid segregant CBS 6412-13A<sup>21</sup>. Hereafter, two further  
59 superior alleles of cytoplasmic-ubiquitin protein-ligase-E3 (UBR2) and cytoplasmic-phosphorelay-  
60 intermediate osmosensor and regulator (SSK1) had found to link with GUT1 for the growing on the  
61 synthetic medium without supporting supplements<sup>22</sup>. These pivotal roles of UBR2 and GUT1 during  
62 glycerol assimilation by yeast had further confirmed by another study that re-sequenced the whole-  
63 genomes a glycerol-evolved strains<sup>23,24</sup>. Although G3P-pathway has evidenced the main catabolic-  
64 pathway for glycerol catabolism in *S. cerevisiae*, its heterologous-replacing with DHA-pathway that  
65 combined glycerol facilitator (FPS) resulted in restores the similar growth of the parental strain.  
66 Furthermore, this replacement in a negative-glycerol grower strain bearing the swapped  
67 UBR2<sub>CBS6412-13A</sub> allele had guided the growth rate to the highest specific growth rate ever reported on  
68 glycerol-synthetic medium<sup>25</sup>.

69 With an approach for the production of 1, 2- propanediol from glycerol, a significant amount  
70 of ethanol (18 g/l) had accumulated during the first day as a byproduct, particularly on the rich  
71 media. This study addressed metabolic engineering strategy combined heterologous-replaces of the  
72 G3P route by DHA-FPS pathway<sup>25</sup> with a module for the production of 1, 2- propanediol, besides,  
73 the down-expression to the gene triosephosphate-isomerase gene (TPI1)<sup>26</sup>. Limiting oxygen  
74 availability in the shake flask cultures showed increasing the production of ethanol from glycerol  
75 (8.5 g ethanol / 51.5 g glycerol) to (15.7 g ethanol / 45 g glycerol) with production rate 0.1g l<sup>-1</sup>h<sup>-1</sup> on  
76 synthetic medium in a recent study for facilitating understanding the future engineering of valuable  
77 products more reduced than ethanol<sup>27</sup> using genetic modifications of heterologous-replaces of the  
78 G3P route by DHA-FPS pathway<sup>25</sup>. It is worth emphasizing glycerol has considered a non-  
79 fermentable carbon source in *S. cerevisiae*<sup>5</sup>; although, such attempts for fermenting it by *S.*  
80 *cerevisiae*. These experiments had initiated by overexpressed a native oxidative-glycerol pathway  
81 (DHA), includes glycerol dehydrogenase (GCY1) and dihydroxyacetone-kinase (DAK), beside  
82 overexpressed a glycerol uptake protein (GUP1) to produce 0.12g ethanol/ g glycerol with 0.025 g l<sup>-1</sup>  
83 h<sup>-1</sup> of production rate<sup>28</sup>. Moreover, the methylotrophic yeast, *Ogataea polymorpha*, had tested for  
84 producing bioethanol from glycerol by overexpressing the genes involved either in the DHA or G3P  
85 pathways with integration with a gene of glycerol transporter FPS1 from *Pichia*  
86 *pastoris*. Furthermore, the recipient strain subjected to overexpress its genes of pyruvate  
87 decarboxylase (PDC1) and alcohol dehydrogenase (ADH1). Nonetheless, the overall ethanol  
88 produced was relatively low (10.7 g ethanol as a maximum accumulated product and 0.132g ethanol/  
89 g glycerol)<sup>29</sup>. Up to date, there is no native or genetically engineered strain promoting the industrial  
90 application of ethanol production from glycerol.

91 On the other hand, we developed a novel pretreatment method for biomass using glycerolysis  
92 with the catalysis of alum  $AlK(SO_4)_2$ , with additionally promoted by a microwave<sup>30</sup>. Hence, there  
93 emerged a need for evolving a model of yeast that can ferment glycerol efficiently after this  
94 glycerolysis for complete establishing our scenario by synergist current 4<sup>th</sup> generation of bioethanol  
95 with its analog of the second or third generation, as well as either first generation. In this study, we  
96 report the details of how is the modeling of yeast cell to redirect the glycerol traffic to bioethanol  
97 production until the industrial levels even in the presence of glucose through the innovation of the  
98 forthcoming systematic metabolic engineering showed in (Fig 1): I) abolishing the inherent glycerol  
99 biosynthesis pathway by knocking-out NAD-dependent glycerol 3-phosphate dehydrogenase  
100 (GPD1) and retaining the second isoform GPD2 for requirements of glycerol 3-phosphate for lipid  
101 metabolism. II) Replacing cytosolic NADH-oxidation through the GPD1 shuttle by a more effective  
102 O<sub>2</sub>-dependent dynamic shuttle of water forming NADH-oxidase (NoxE) to renovate NAD<sup>+</sup> for that  
103 integrated gene of glycerol dehydrogenase (GDH). III) Knocking out the first gene of the G3P  
104 pathway (GUT1). IV) Imposing a vigorous oxidative pathway via overexpressing two copies of both  
105 the heterologous-genes of glycerol dehydrogenase *OpGDH*, and the glycerol facilitator *CuFPS1*,  
106 besides, the endogenous genes of TPI1, and DAK1 with one copy of DAK2.

## 107 108 **Results**

### 109 110 **Effect of Systematic metabolic engineering:**

#### 111 **Step no. 1: vigorous glycerol dehydrogenase is an essential opener to initiate glycerol**

112 **fermentation.** Initial verification for overexpressing of glycerol dehydrogenase from *Ogataea*  
113 *polymorpha OpGDH*<sup>31</sup> in the D452-2 strain of *S. cerevisiae* showed strong effects compared with  
114 native gene *ScGCY1* even if a *ScGCY1* integrated with other endogenous oxidative pathway genes  
115 (Glycerol proton symporter of the plasma membrane *ScSTL1*, *ScDAK1*, *ScDAK2*, and *ScTPI1*) in

116 recombinant strain GF2 (Table 1). The strain harboring the GDH gene, which named GDH, is  
117 consuming glycerol faster than GF2 with an increase of 21% in ethanol production, whereas it was  
118 only 10% in GF2 compared with the parental strain (Fig. 2). In full aerobic fermentation (1/10  
119 liquid culture/flask volume) of mixed glucose and glycerol using GDH strain improved the glycerol  
120 consumption and ethanol production from 25% to 40% and from 21%–64%, respectively, before  
121 switching to the re-utilization of ethanol when compared with the previous semi-aerobic condition  
122 (Figs. 2 and 3). These results indicating the first step for the efficiency of glycerol fermentation  
123 should be through an effective GDH started here with an act of *OpGDH*. Furthermore, we confirmed  
124 that glycerol consumption was through the constructed DHA, where glycerol consumption has not  
125 significantly decreased after knocked-out the *ScGUT1* gene, which is the first gene in the G3P  
126 pathway (Fig. 2). Also, activating the genes of the G3P pathway (*ScSTL1*, *ScGUT1*, *ScGUT2*, and  
127 *ScTPI1*) in a recombinant strain named GA2 (Table 1) did not impose significant improvement in  
128 the ethanol production (Fig. 2).

129  
130 **Step no. 2: efficient rewriting NADH pathway oxidation in *S. cerevisiae* by an O<sub>2</sub>-dependent**  
131 **dynamic shuttle of water forming NADH-oxidase (*LlNoxE*) replaces GPD1.** We  
132 comprehensively studied replacing GPD shuttles by water-forming-NADH-oxidase from  
133 *Lactococcus lactis* subsp. *lactis* (*LlNoxE*). As the GPD shuttle is the first step in glycerol  
134 biosynthesis and represents one of the well-known systems for renovating a cytosolic NAD<sup>+</sup> from  
135 NADH produces during the metabolic process such as those from the oxidation of glyceraldehyde  
136 3- phosphate (GA3P). As a consequence, glycerol is secreting at the unbalances of redox -  
137 reactions toward NADH. Therefore, we first rated the participation levels of GPD1 and GPD2 in  
138 glycerol biosynthesis in our ancestor strain D452-2 at 10% of glucose fermentation by deleting  
139 each isoform separately. The data obtained, reveals that the participation ratio of GPD1 in

140 glycerol biosynthesis was 82%, where glycerol secretion from  $\Delta$  GPD1 was 0.47g/2.56g of wild  
141 type WT; while it was 23% (2.08g/2.56g WT) with  $\Delta$  GPD2 (Table 2; Fig.S1a). Replacing GPD1  
142 with *LiNoxE* reduced glycerol secretion by 98%, where 0.14g glycerol /2.56g of WT has secreted,  
143 whereas it only 29% with NoxE/ GPD2 strain which secreted 1.82g/ 2.56 of WT (Table 2;  
144 Fig.S1a). On the other hand, replacing both GPD1 and GPD2 with *LiNoxE* not only prevent glycerol  
145 formation but also reduced glucose consumption significantly and obstructed cell growth and  
146 fermentation by almost the same levels at 15% while increased secretion of acetate by 2.46 fold  
147 (Table 2; Fig.S1a-e). Similarly, replacing GPD1 by *LiNoxE* with deleting GPD2 (Table 2; Fig.S1a-  
148 e). Comparatively, the overexpressed *LiNoxE* gene in the URA3 locus with the conserved native  
149 activity of glycerol biosynthesis pathway exhibited a moderate reduction in glycerol production of  
150 only 41% (1.53g/ 2.56g) in the D452-2 strain (Table 2; Fig.S1a). Notably, replacing GPD  
151 with *LiNoxE* switched the glycerol production to an increase in acetate production (Table 2;  
152 Fig.S1b). Exclusively, replacing GPD1 with *LiNoxE* is an excellent approach to eliminating glycerol  
153 formation during glucose fermentation to ethanol, where ethanol production increased by 9 %  
154 (0.474/ 0.432 g ethanol / g glucose as calculated in table 2, therefore, consolidating this replacement  
155 with GDH could improve glycerol conversion to ethanol.

156  
157 **Step no. 3: integrating GDH and NoxE with  $\Delta$ GPD1.** Owing to the previous results from the  
158 recombinant GDH strain and the data of replaced the shuttles of oxidizing the cytosolic NADH by  
159 *LiNoxE*, therefore, we studied the recycling outputs of NAD<sup>+</sup>/NADH between the GDH and  
160 *LiNoxE*. In addition to this recycling, deleting GPD1 during that substitution with *LiNoxE* will  
161 abolish glycerol formation and decreases the ramification of DHAP, which consolidates the  
162 straightforward to glycolysis route. As a result of that thinking, we engineered a further strain that

163 combined GDH with *LiNoxE* with a  $\Delta$  GPD1 as listed in table 1. This round of recombination  
164 (GDH+NOXE strain) has tested for ability fermenting glycerol in comparison with GDH or  
165 *LiNoxE*, as well as the wild type strain. This innovative integration clearly showed improvements  
166 in both efficiency of glycerol conversion to ethanol and delayed in the time of reprogramming the  
167 cell to utilize a produced ethanol. In figure 3 at 6h, both strains of the ancestor, and the  
168 engineered GPD1/*LiNoxE* started their re-utilize the produced ethanol from glucose without  
169 significant consumption in glycerol, where maximum ethanol produced was 4.7 g/l ethanol. In  
170 GDH strain, the time of reusing the produced ethanol delayed to 26h with raises in the ethanol  
171 production to 11.82 g/l, which represents 0.27 g ethanol/ the consumed glucose and glycerol. In  
172 the case of GDH+NOXE, the integration here not only boosted the ethanol production to 13.27 g/l  
173 (0.31g ethanol/ the consumed glucose and glycerol) at 26h, but also extended the fermentation  
174 time to 32h, and further raised production of ethanol to 14.42 g/l before the switching to consume  
175 that ethanol (Fig. 3).

176  
177 **Step no. 4: overexpressing the rest of the DHA pathway genes; TPI1, DAK1, DAK2, and**  
178 **FPS.** Although clear impacts of recycled inputs in the previous recombination, we deduced a  
179 further limiting in the activity of other genes in the DHA pathway TPI1, DAK, FPS genes, which  
180 affect that full traffic of glycerol conversion to ethanol. Therefore, we proceeded to overexpress  
181 the rest of the genes included in the DHA pathway at this stage of systematic engineering. A  
182 promoter phosphoglycerate kinase (PGK) with its terminator had used to activate the endogenous  
183 genes TPI1, DAK1, and DAK2. The gene of glycerol facilitator from *Candida utilis* (*CuFPS1*)<sup>32</sup>  
184 had heterologous-expressed under the control of PGK promoter and Ribosomal 60S subunit  
185 protein L41B terminator (RPL41B). The previous recombinant-strain GDH+NOXE has used as a



186 competent cell for receiving this one-set of genes in AUR-1C locus to generate a new strain,  
187 which had named GDH+NOXE+FDT (Table 1). Unequivocally, this fourth step of recombination  
188 solved one of the main problems in this study, where is prevented the phenomena of the switching  
189 to utilizing ethanol before the full consumption of glycerol. A consumption rate reached  $1 \text{ g l}^{-1}\text{h}^{-1}$   
190 and produced 20.95 g/l of ethanol by this recombinant strain. Nonetheless, its conversion  
191 efficiency of ethanol production appeared to be less than 48% of the theoretical value (Fig. 3).

192  
193 **Step no. 5: Super-expressing the DHA pathway genes by another copy of genes; *ScTPI1*,**  
194 ***ScDAK1*, *OpGDH*, and *CuFPS1* with abolishing the native G3P pathway.** The stemming  
195 results from the fourth step of genetic engineering posited the effect of the limited activities of the  
196 other genes on paced productivity with the visibility to strengthen the pathway activity by another  
197 copy. We carefully selected and designed the strongest-expression systems that may not be  
198 affected by the repressors of regulators to constitutively-express this assortment of genes<sup>33-36</sup>. By  
199 merits of using the hybrid of Gibson assembly and PCR, we constructed one module named M1  
200 (Table 3; Fig. S2) were their expression systems; TEF1 promoter-CYC1 terminator, TYS1  
201 promoter-ATP15 terminator, TDH3 promoter-mutated d22DIT1 terminator, and FBA1 promoter-  
202 TDH3 terminator, respectively with genes *CuFBS1*, *OpGDH*, *ScDAK1*, and *ScTPI1*. Therefore,  
203 we intensified a whole glycerol oxidation pathway by integrating another copy of  
204 genes *CuFPS1*, *OpGDH*, *ScDAK1*, and *ScTPI1* during the replacement of the GUT1, which  
205 abolished the G3P pathway, for continuing the overcoming of the previous inadequacies in this  
206 fifth stage of recombination. Interestingly, we griped unique findings with step five of  
207 recombination in the glycerol consumption and ethanol production that never reported in any  
208 organism with the evolved strain GDH-NOXE-FDT-M1 named SK-FGG (Table 1, Fig.3). Its

209 consumption rate reached  $2.6 \text{ g l}^{-1} \text{ h}^{-1}$  from glycerol at the described experimental conditions, and  
210 the productivity paced  $1.38 \text{ g l}^{-1} \text{ h}^{-1}$  of ethanol with conversion efficiency reached  $0.44 \text{ g ethanol/g}$   
211 glucose and glycerol (Fig. 4).

212

213 **Osmotolerance of the engineered strain (SK-FGG) and the effect of higher aeration:** the

214 strain SK-FGG exhibiting outstanding performance in aerobic conditions at that higher initial

215 concentration of glycerol in YP medium, where its conversion efficiency reached  $0.49 \text{ g}$

216 ethanol/g glycerol with a production rate of  $> 1 \text{ g l}^{-1} \text{ h}^{-1}$  of ethanol (Fig. 4a). Even with the

217 mixing of glucose with glycerol at the same initial concentration, its conversion efficiency was

218 comparatively the same (Fig 4b). Interestingly, the strain engineered here glows in its capacity

219 to harmonize fermenting the glycerol with glucose, as well as, accumulation of 9% of

220 bioethanol with additional fed-batching of glycerol, although the efficiency decreased to  $0.43 \text{ g}$

221 ethanol/g glycerol (Fig. 4c). Notably, increasing the aeration by increasing the volume of

222 flasks with keeping the constant of the broth volume accelerated the glycerol consumption

223 remarkably to  $>5 \text{ g l}^{-1} \text{ h}^{-1}$ . Also, the rate of ethanol production increased to  $>2 \text{ g l}^{-1} \text{ h}^{-1}$ .

224 Nonetheless, its conversion efficiency decreased to  $0.42 \text{ g ethanol/g glycerol}$  (Fig. 4d). We

225 observed some other minor uncharacterized peaks during the analysis of these samples, as a

226 further point for research in the future. It is also worth mentioning that a strain SK-FGG has

227 proved its capability to convert glycerol at larger volumes where we scaled up the

228 experimental capacities to 1, and 3 liters via the mini-jar 5L fermentor (see Methods section).

229 Nonetheless, its rates and efficiencies decreased due to higher fluctuating of the dissolved

230 oxygen during the fermentation by our available system, where a more advanced control

231 system is required.

232

## 233 Discussion

234  
235 Recently, microbial technologies for exploiting glycerol as a carbon source for producing  
236 valuable products have gained higher attention, where a considerable amount of glycerol as an  
237 unavoidable by-product from the expansion of biodiesel industries had accumulated. In our other  
238 scenario, glycerol has evidenced as a delignifying agent during pretreating biomass with alum in the  
239 glycerolysis process<sup>30</sup>. Therefore, working on engineering the yeast genetically for generating the  
240 ability to convert glycerol into ethanol becomes inevitable for such all of these perspectives. *S.*  
241 *cerevisiae* has full genes for two metabolic pathways (DHA and G3P) for glycerol catabolism  
242 showed in Fig.1; nonetheless, glycerol had considered as non-fermentable and unfavorable carbon as  
243 a feedstock<sup>5, 15</sup>. The distinctive differences seen in the ability to grow on the synthetic medium had  
244 based on the genetic background of strains. Besides, that growth is a quantitative trait based on  
245 alleles on genome<sup>21</sup>. Hence, prompted to scrutinize in the strain used here, where D452-2 originated  
246 from three different ancestor strains via five sequential segregates crossing, one of the parental  
247 strains is known its belonging to *S. cerevisiae* S288C<sup>37-39</sup> (Table 1 and Fig. S3). D452-2 didn't show  
248 the ability of growth on synthetic medium without supplementing supports of uracil, leucine, and  
249 histidine, although we confirmed that the UBR2 allele not truncated as in the CEN.PK family<sup>22, 23</sup>.  
250 At the moment, it is not clear whether this disability to grow on synthetic medium in our strain  
251 related to the genetic background as those of the negative-glycerol grower in 13 of *S.*  
252 *cerevisiae* strains<sup>21</sup> or generated by the interrupted genes Ura3, Lue2, and His3 in D452-2 strain.  
253 Further studies are needed to reveal this point or ranking its growth rate with that previous well  
254 studied strains<sup>21</sup> to quantify trait the growth alleles on synthetic medium. In addition to these  
255 unstudied points, we decided to use the rich medium represented in yeast peptone (YP), where it

256 showed a significant accumulated amount of ethanol onset fermentation of glycerol with engineered  
257 for production of 1, 2- propanediol<sup>26</sup>.

258 Although revoking the TPI1 gene has considered a pivotal hub for the production of glycerol  
259 from glucose<sup>40</sup>, which is the reverse direction here, it hasn't integrated with the previous study that  
260 examined overexpressing the native DHA-pathway<sup>28</sup>. Therefore, we combined the overexpression of  
261 the TPI1 gene with the DHA pathway to track the restrictions in that oxidative pathway in  
262 fermenting glycerol. Hence, we constructed a strain named GF2, which overexpressed its genes  
263 *ScSTL1*, *ScGCY1*, *ScDAK1*, *ScDAK2*, and *ScTPI1*. Concurrently, we recognized the limited  
264 activity of the *ScGCY* gene compared with a glycerol dehydrogenase from *Ogataea polymorpha*<sup>41</sup>.  
265 Therefore, we constructed a yeast harbored *OpGDH* named GDH to be testing with GF2 during  
266 fermenting glycerol. As a result of these comparing studies, such an active *OpGDH* gene is the first  
267 key for deciphering glycerol fermentation, although the sole integration of *OpGDH* not enough to  
268 induce an efficient fermentation (Fig. 2). On the other hand, overexpressing the native glycerol  
269 catabolic pathway G3P in strain named GA2 did not demonstrate promising results as this oxidative  
270 pathway. The assumption that may be contemplating here is the limit of the respiratory chain during  
271 glycerol consumption, thus, restrict the renovation of FAD<sup>+</sup> for converting glycerol 3-phosphate to  
272 DHAP through GUT2, considering this phosphorylated G3P-pathway is subjecting to the repression  
273 and transcriptional regulation with the presence of glucose<sup>17-20, 42, 43</sup>.

274 Besides the induction for expressing target genes, one of the other main obstacles affecting  
275 the efficiency of microbial production is to meet the stoichiometries of the engineered metabolic  
276 pathways, cofactors, and ATP/oxygen ratios, especially those pathways which require cofactors for  
277 their activation<sup>2, 9, 44</sup>. As long as an integrated *OpGDH* in *S. cerevisiae*, we visualized the GPD  
278 shuttles will promote to activates the oxidation of the plethora from cytosolic NADH and a reduction

279 of DHAP into G3P pathway. Besides, a ramification of glycerol 3-phosphate into glycerolipid  
280 pathway takes place<sup>45</sup>. Likewise, the DHAP may be distributing into phospholipid and  
281 methylglyoxal biosynthesis<sup>45, 46</sup>. Moreover, inasmuch of fermentable sugar, especially in the  
282 presence of oxygen, there is a plethora of cytosolic NADH. As a result, there is a need for shuttles  
283 for re-oxidizing this surplus. The shuttle of GPD plays an essential role in this regard with reducing  
284 DHAP to glycerol 3-phosphate to keep this homeostasis. Intracellular redox homeostasis in *S.*  
285 *cerevisiae* comprising > 200 reactions; thus, the shuttles oxidizing NADH has been well studied<sup>16, 44,</sup>  
286 <sup>47</sup>. One of the interesting ones is the catalyzing oxidation of cytosolic NADH by heterologous-  
287 overexpressing a water-forming oxidase gene from *Streptococcus pneumoniae* in *S. cerevisiae* for  
288 reducing the cytosolic NADH, and the overflow to glycerol biosynthesis<sup>44</sup>. Nonetheless, there are no  
289 studies regarding the effects of replacing the native shuttles of GPD by other shuttles for oxidizing  
290 the cytosolic NADH, such as those of water-forming. Therefore in the second round of  
291 recombination in this study, we comprehensively focused on preventing that overflows to glycerol  
292 biosynthesis with the conservation of intracellular redox homeostasis during fermenting glucose. The  
293 Investigation of the nine constructed strains of either deleted or replaced GPD1 or/and GPD2 by the  
294 NoxE gene, showed replacing GPD1 by *LiNoxE* is the best approach, where glycerol biosynthesis  
295 effectively abolished by 98%, and an improvement in the fermentation efficiency by 9% (Table 2).

296 Expectedly, this single replacement will not exhibit further progress toward glycerol  
297 fermentation (Fig.3). Assuredly, we referred to the act of the low activity of native glycerol  
298 dehydrogenase ScGCY1<sup>41</sup>. As detailed above, a ramification of DHAP represents another hindrance  
299 for the straightforward toward glycolysis from glycerol. In this juncture, a reduced circulation of  
300 DHAP into the G3P pathway had confirmed to be efficient for glycerol fermentation by integrating  
301 this replacement of GPD1 by *LiNoxE* within the GDH strain. As expected, the strain harbored this

302 unique point of integration (GDH-NOXE) in this regard showed substantial improvement in ethanol  
303 production from glycerol reached 28 % compared with GDH strain at that studied conditions, which  
304 not considered the other parameters such as oxygen level (Fig.3). The role of abolishing GPD1 had  
305 explicitly calculated from the data of fig. 3, which has represented 43 % of that improved ratio.  
306 Utilize the recycles of cofactors NADH/NAD<sup>+</sup> for production of 1, 2- propanediol has been well  
307 studied during fermenting glycerol<sup>26</sup>. Nevertheless, it seems non-stoichiometries of cofactors in the  
308 engineered pathway have compensated with the flowed to the ethanol accumulation relatively with  
309 rich media and the faster growth rates at the onset of fermentation and lately with re-consumption of  
310 ethanol by alcohol dehydrogenase (ADH2)<sup>26</sup>.

311 The importance around the activation of the other genes in the DHA pathway has confirmed,  
312 through the continued bioethanol production until the full consumption of glycerol (Fig.3). Although  
313 we didn't evaluate the effect of overexpressing each gene individually, we recognized the  
314 cooperative effects for overcoming that traditional-ambiguous phenomenon of re-consuming the  
315 onset produced ethanol earlier than the full consumption of glycerol. In this regard, it had reported  
316 that the permeability of the three-carbon compounds including glycerol in *Candida utilis* is much  
317 faster than in the baker's yeast, which supports the efficient utilization of glycerol, even at low  
318 concentrations<sup>48</sup>. Therefore, heterologous-expressing *CuFPS1* in *S. cerevisiae* could support the  
319 influxes of glycerol in our strain as reported earlier<sup>25, 26, 32</sup>. Also, DAK1 and DAK2 had characterized  
320 for detoxifying DAH, with  $K_{m(DHA)}$  of 22 and 5  $\mu$ M and  $K_{m(ATP)}$  of 0.5 and 0.1 mM, respectively,  
321 thus overexpressing DAK2 which is a much lower  $K_{m(DHA-ATP)}$  with DAK1 here definitely detoxify  
322 DHA that may accumulate by the action of the introduced *OpGDH* and *CuFPS1* in this . Besides,  
323 efficiently transfer DHA to DHAP. Furthermore, with presented genetic modifications during the  
324 introduction of *CuFPS1*, and *OpGDH*, with overexpressing *ScDAK1*, and *ScDAK2*, DHAP may be

325 accumulated to substantial concentration to influx the G3P-pathway through the GPD2 or saturated  
326 the native activity of TPI1 to be turned into pentose phosphate pathway especially with the presence  
327 of glucose<sup>49</sup>. Through scrutinizes in the previous studies abolished the activity of TPI1, we  
328 recognized the pivotal role of overexpressing TPI1 in this study, where the intracellular  
329 concentration of DHAP accumulated to 30-fold<sup>50</sup> and when this deactivation further coupled with  
330 other deletions of NDE1, NDE2, and GUT2, the fermentation product had shifted from ethanol to  
331 glycerol<sup>40</sup>.

332         However, integrate one copy of the whole DHA- pathway with NoxE generated the ability of  
333 yeast to convert all supplemented glucose and glycerol to ethanol. Nonetheless, we recognized that  
334 conversion efficiency may still be affected by the robustness of native programmed-glycolysis.  
335 Thence, further strengthening of the whole genes in the DHA pathway by another copy under  
336 different expression systems could overcome this obstacle. Interestingly, the other copy  
337 of *CuFPS1*, *OpGDH*, *ScDAK1*, and *ScTPI1* that replaced GUT1 met our expectations and reaches  
338 by efficiencies and the production rates to that comparable with the industrial application, where the  
339 efficient conversions reached 98% of theoretical ratio with production rates 1.38 g l<sup>-1</sup> h<sup>-1</sup>. A potential  
340 using the strategy of multi-copy with optimizing the stoichiometries of the metabolic pathway had  
341 considerably boosted the production, e. g. six copies of the farnesene synthase gene, which  
342 integrated into yeast to improve the synthesise of farnesene<sup>2</sup>. Here, with the second copy of  
343 integration, we further selected highly constitutive expressing system in yeast<sup>33-36</sup> to extend the  
344 production levels and efficiencies, where TEF1 promoter-CYC1 terminator, TYS1 promoter-ATP15  
345 terminator, TDH3 promoter-mutated d22DIT1 terminator, and FBA1 promoter-TDH3 terminator,  
346 respectively with genes *CuFBS1*, *OpGDH*, *ScDAK1*, and *ScTPI1*. Owing to the efficient SK-FGG  
347 strain generated, and its introduced pathway, oxygen supplements were the limit. Surprisingly,

348 fermentation rates doubled with increasing aeration to  $>2 \text{ g l}^{-1} \text{ h}^{-1}$ . Nonetheless, we are currently  
349 working on further improvements to increase the efficiency during such production rates, as well as  
350 utilize glycerol's high reduction merit for improving the fermentation efficiencies of other carbons.

351 In this study, we are reporting the discovery for the modeling of glycerol traffic to the  
352 industrial levels of bioethanol production. This modeling includes the integration of (i) Impose  
353 vigorous expression to all genes in the glycerol oxidation pathway DHA. (ii) Prevalence of the  
354 glycerol oxidation by an oxygen-dependent dynamic by water-forming of NADH oxidase NoxE,  
355 which controls the reaction stoichiometries with regenerate the cofactor  $\text{NAD}^+$ . (iii) Revoking the  
356 first step of both glycerol biosynthesis and glycerol catabolism through G3P, as shown in (Fig. 1).  
357 Our study provides an advancing use of metabolic engineering for re-routing the glycerol traffic in *S.*  
358 *cerevisiae* with tracking ethanol production to the highest levels that never attained by any other  
359 native or genetically engineered organism<sup>27, 28, 52, 53, 54</sup>. Enormous considerations for the global  
360 demands for bioethanol reported, although the limited resources. Thus, it constrained the global  
361 annual bioethanol production to nearly 28.5 million gallons, which represents  $<2.7\%$  of the  
362 transportation fuels<sup>55-57</sup>. Therefore, the current study is expanding the horizon of utilizing the surplus  
363 of glycerol directly to produce bioethanol. By fermenting glycerol, we avoid the burden of the  
364 pretreatments, and enzymatic saccharification, besides the problems of fermentation inhibitors.  
365 Furthermore, the engineered strain in this study has revised a promising scenario of biorefinery. SK-  
366 FGG dramatically improved bioethanol production from bagasse with the incorporation of glycerol,  
367 which has pretreated the bagasse with  $\text{alum}^{30}$  and produced the industrial levels of bioethanol from  
368 that glycerolysis mixture (Data not showed). The outcome of this study is to promote the association  
369 between bioethanol and biodiesel industries, which may develop their expansions with



370 overburdening the sustainabilities. It may also prevent a decrease in the present glycerol price as  
371 well as broadening the horizons of glycerol producing industries for the production of glycerol.

372

## 373 **MATERIALS AND METHODS**

374

### 375 **Section I: Cassettes and plasmid construction in this study**

#### 376 **1- Construction of pPGK-*ScTPI1*, *ScDAK2*, *ScDAK1 ScGCY1*, *ScSTL* and pPGK-*ScTPI1*, 377 *ScGUT2*, *ScGUT1*, *ScSTL1* plasmids.**

378 We obtained the genes' DNA from the ancestor strain D452-2 to clone the plasmids in this  
379 section. At first, disrupting the cell walls by re-suspended toothpick-touched cells in 20 µl 30 mM  
380 NaOH at 95°C for 10 min and then used directly as a template for PCR, fresh 1µl of that disrupted  
381 cells is suitable for 50 µl of PCR mixture. All primers used to obtain the native genes were designed  
382 based on the sequences available on the Saccharomyces Genome Database  
383 (SGD): <https://www.yeastgenome.org/>. For assembling the following plasmids: pPGK-*ScTPI1*,  
384 pPGK-*ScDAK2*, pPGK-*ScDAK*, pPGK-*ScGCY1*, and pPGK-*ScSTL*, the following genes: STL1,  
385 GCY1, DAK1&2, and TPI1 obtained from genomic DNA of ancestor strain by PCR. High fidelity  
386 polymerization of KOD-plus neo with their corresponded primers (Section 1 – table S1) used  
387 during this amplification. XhoI site of DAK2 deleted before cloning. These DNA genes were  
388 purified from the PCR mixtures by columns obtained from Nippon Genetics Co., Ltd., with its  
389 accessories, and then form their cohesive ends according to the designated primers and restriction  
390 enzymes. At first, we separately cloned each gene in pPGK/URA3 plasmid<sup>58</sup>, under the control of  
391 the expression system PGK promoter and its terminator (Table 3). We further replaced the URA3  
392 gene in a pPGK-URA3 plasmid with a gene of HIS3<sup>(Ref59)</sup> using the feature of a synthetically  
393 adding an overlapped sequences from pPGK plasmid to HIS3 marker using PCR and primes and

394 vice-versa (Section 3 – table S1). Then, a Gibson Assembly Master Mix assembles the overlapping  
395 ends of the two fragments to form PGK-HIS3 plasmid. With construct pPGK-HIS3 plasmid (Table  
396 3), we granted HIS3 locus for homologous recombination in *S. cerevisiae* after linearizing the  
397 plasmid at the BsiWI site. We obtained the previous plasmids and confirming their genes sequences  
398 by sequencing, detailed relevant primers listed in (Section 2 – table S1). Next, we cut XhoI/SalI-  
399 TPI1 cassette and inserted it into XhoI/SalI sites of a newly constructed plasmid pPGK-HIS3  
400 plasmid. Following, integrating the genes with their systems together in one plasmid started by  
401 connecting the DAK2 set into the SalI site of the template plasmid started here by pPGK-TPI 1. The  
402 deadly ligations (XhoI/SalI sites) that cannot reopen were used repeatedly during the ligation of  
403 new cassettes and form the new plasmids. Repeatedly, DAK1, GCY1, and STL1 combined.  
404 Ultimately, pPGK-*Sc*TPI1- *Sc*DAK2- *Sc*DAK1- *Sc*GCY1- *Sc*STL1 plasmid was constructed (Table  
405 3). Continuing with the same procedures, the plasmid pPGK-*Sc*TPI1- *Sc*GUT2- *Sc*GUT1- *Sc*STL1  
406 also established.

407  
408 **2- Construct TDH3p-d22DIT1t, TDH3-d22-opGDH and TDH3-d22-LINoxE plasmids**  
409 **a. Cassette1:** partial end of GPD1promoter-TDH3p-d22DIT1terminator-partial front side of GPD1  
410 terminator and TDH3p-d22DIT1t plasmid.

411 The mutated terminator d22DIT1t purchased from (Integrated DNA Technology (IDT)  
412 Company, Tokyo, Japan) according to the published sequences<sup>35</sup>. TDH3 promoter magnified from  
413 the genomic DNA of the ancestor strain D452-2 using PCR and the designated primers (Section 4 –  
414 table S1). All primers bought from FASMAC Company, Japan. Moreover, flanking sequences  
415 added upstream of the promoter and downstream of the terminator using the feature of PCR  
416 polymerization with primers possess a long-desired tail, and a further extension to those flanking

417 sequences with the addition of restriction sites accomplished by PCR in the second step (Section 4 –  
418 table S1). Then, cohesive the ends of that couple of DNA fragments by restriction enzymes XhoI,  
419 NotI for the first fragment and NotI, SalI for the second one. After purification of the fragments  
420 using agarose gel and columns of Nippon Genetics Co., Ltd., one-step cloning coupled the TDH3  
421 promoter and mutated DITI terminator into XhoI/SalI of PGK/URA3 plasmid. Then TDH3p-  
422 d22DIT1t- URA3 plasmid constructed (Table 3).

423 **b. Cassette 2:** partial end of GPD1promoter-TDH3p-*OpGDH*-d22DIT1t-partial front side of  
424 GPD1terminator and TDH3-d22-*opGDH* plasmid.

425 The previously constructed TDH3p-d22DIT1t/URA3 plasmid used as a template for constructs  
426 the next plasmid by further cloning an *Ogataea polymorpha* glycerol dehydrogenase gene  
427 (*OpGDH*), deposited in gene bank under the accession number XP\_018210953.1. *OpGDH*  
428 synthetically purchased from the IDT Company. Primers listed in (Section 4 of Table S1), and full  
429 sequences are available in (Table S2).

430 **c. Cassette 3:** partial end of GPD1promoter-TDH3p-*L/NoxE*-d22DIT1t-partial front side of GPD1  
431 terminator and TDH3-d22- *L/NoxE* plasmid.

432 We also purchased, (synthetically from IDT Company), the water-forming NADH oxidase gene  
433 of *Lactococcus lactis* based on sequence available on gene bank accession number AAK04489.1 and  
434 cloned it into TDH3p-d22DIT1t to assemble TDH3-d22- *L/NoxE* plasmid (Tables 3, and S2).

435 **d. Cassette 4:** partial end of GPD2promoter-TDH3p-*L/NoxE*-d22DIT1t-partial front side of GPD2  
436 terminator and TDH3-d22- *L/NoxE* plasmid.

437 In this step, we replaced the flanking sequences of GPD1 promoter and terminator with GPD2  
438 using PCR and the primers listed in (Section 5 – table S1)

439

440 **3- Construct multiplex pCAS-gRNA-CRISPR systems.**

441 The multiplex pCAS-gRNA system was a gift from Prof. Jamie Cate<sup>60</sup> (Addgene plasmid #  
442 60847; <https://www.addgene.org/60847/>). For that, we used the online tool for the rational design of  
443 CRISPR/Cas target to allocate the highest probability of the on-target sites for the gRNA in the  
444 genomic DNA of *S. cerevisiae*: <https://crispr.dbcls.jp/> <sup>(Ref61)</sup>. Accordingly, the sequence of the  
445 primers designed based on previously allocated sequence (20 bp before the PAM), with another 20  
446 bp from sgRNA or HDV ribozyme for overlapping (Sections 4.2, 5.1 and 7.1 – table S1). First, PCR  
447 synthesizes two fragments from the template, pCAS-gRNA plasmid. The first one amplified by PCR  
448 using a forwarding primer called pCas For., which located upstream of the gRNA scaffold at the  
449 SmaI site of pCas and the antisense primer, which has a reverse sequence of target gRNA. The  
450 second fragment amplified by forwarding primer, which has a sense sequence of gRNA and a  
451 reverse primer called pCas Rev., located downstream of the gRNA scaffold (Section 4.2 – table S1).  
452 After purifying each DNA part, overlapping and integration carried out by PCR using the pCas For.,  
453 and pCas Rev. primers. Then, the produced fragment restricted to SmaI-PstI sites for the cloning into  
454 a truncated pCAS-gRNA plasmid with SmaI-PstI. As a result, a new multiplex pCAS-gRNA  
455 plasmid formed. Repeatedly steps have done with constructing all multiplex pCAS-gRNA plasmids  
456 that target GPD1, GPD2, and GUT1 (Table 3). We confirmed the newly constructed systems by  
457 sequencing their whole scaffolds.

458

459 **4- Construct pAUR101- *Cu*FPS1 and pAUR101-*Cu*FPS1, ScTPI1, ScDAK2, ScDAK1**  
460 **plasmids.**

461 *Candida utilis*, NBRC 0988, obtained from the National Biological Resource Center (NBRC) of  
462 National Institute of Technology and Evaluation NITE, Japan. It used as a template for getting the

463 gene glycerol facilitator FPS1 (*CuFPS1*). The sequence of *CuFPS1* included in the deposited gene  
464 bank accession number BAEL01000108.1. Original pAUR101 plasmid purchased from Takara Bio,  
465 Inc., Japan, and the primers used to establish this plasmid listed in (Section 6 – table S1). A full  
466 sequence for cassette, PGK-*CuFPS1*-RPL41Bt, transferred to (table S2). First, we constructed a  
467 pAUR101-PGKp-RPL41Bt vector by one-step cloning of the SmaI-NotI PGK promoter (fragment1)  
468 and NotI-SalI-RPL41B terminator (fragment 2) into SmaI-SalI pAUR101 vector and then cloning a  
469 cohesive ended-NotI-*CuFPS* gene into dephosphorylated NotI site of pAUR101-PGK-RPL41B  
470 vector to assemble pAUR101-PGKp-*CuFPS1*-RPL41Bt vector. To constitute pAUR101-  
471 *CuFPS1*, *ScTPI1*, *ScDAK2*, *ScDAK1* plasmid, we detached the set of cassettes, *ScTPI1*, *ScDAK2*,  
472 and *ScDAK1*, from previously constructed plasmids, pPGK-*ScTPI1*, *ScDAK2* and *ScDAK1* (Table  
473 S1), using restriction enzymes XhoI-SalI and re-inserted that set of cassettes, *ScTPI1*, *ScDAK2*,  
474 and *ScDAK1*, into the SalI site of pAUR101-PGK-*CuFPS1*-RPL41B plasmid (Table 3).

475 **5- Construct Module M1; *CuFPS1*, *OgGDH*, *ScDAK1*, *ScTPI1* cassettes with flanking**  
476 **sequences of GUT1 promoter and terminator in plasmid pAUR101.**

477 At first, we obtained all fragments which will form the module M1 separately by PCR (Fig. S2);  
478 also, *CuFPS1* and *OpGDH* genes mutated d22DIT terminator amplified from their synthetic DNA  
479 stocks, whereas other fragments magnified from the genomic DNA of the D452-2 strain (Fig. S2).  
480 The full sequence of the module M1 is also accessible in (table S2), and the details of the primer  
481 listed in (Section 7 – table S1). Purification of the 12 amplified DNA fragments was carried out on  
482 1%–2% agarose gel and then recovered by the FastGene Gel/PCR Extraction Kit (Nippon Genetics  
483 Co. Ltd) according to the manufacturer’s protocol. Accordingly, we obtained highly purified  
484 fragments before the onset of assemblies using the Gibson Assembly Master Mix. Effectively, we  
485 joined the first three parts seamlessly, as well as for every next three fragments (Gibson’s protocol).

486 Also, we directly amplified each set by PCR and then purified them again on the agarose gel.  
487 Repeatedly, we gathered the first six parts, as well as the other six fragments, and then assembled the  
488 whole module M1. We further added the SacI site to the upstream of the module M1 and SmaI site to  
489 the downstream as well. These restriction sites provided for cloning the module M1 into SacI- SmaI  
490 sites of pAUR101 vector to form pAUR 101-M1 (table 3). Finally, we transferred that vector, pAUR  
491 101-M1, into *E. coli* as described previously and also confirmed the correct structure of M1 by  
492 sequencing the whole module M1 from pAUR-M1.

493

## 494 **Section II: Transformation and strains recombination in this study**

495 All the previous plasmids stored in *E. coli* NEB 10-beta, for further the uses of production the  
496 required plasmids or cassettes, using the heat shock method according to the procedures provided  
497 with the competent cells. All plasmid extractions performed using the QIAprep Spin Miniprep Kit  
498 following the manufacturer's protocol. All measurements of DNA were estimated using BioSpec-  
499 nano (Shimadzu, Japan) and stocked in freezing at -20 °C for future uses. Yeast transformation by  
500 Fast Yeast Transformation™ kit (Takara Bio) used for integrated linear pAUR101 vector and its  
501 associated genes in AUR1-C locus, linear pPGK plasmid with its cloned genes in either HIS3 or  
502 URA3 loci as well<sup>37</sup>. For achieving editing the genome and the replacement of GPD1, GPD2, and  
503 GUT1 genes with its designated DNA repairing cassette or module, we used the protocol of  
504 CRISPR-Cas9 genome engineering in *S. cerevisiae* cells<sup>62</sup>. We confirmed target replacements using  
505 PCR check for the inserted repairing cassettes with primers from upstream and downstream of the  
506 flanking recombined loci. Primers listed down in each section (Table S1). Furthermore, we  
507 cultivated up to 10 generations of the selected evolved strains to confirm the loss of pCAS plasmid

508 and to re-confirm the recombination. All recombination strains and their genotypes were listed  
509 (Table 1).

510

### 511 **Section III: Fermentation procedures and analysis:**

512 The initial fermentation experiments tested in 100 ml shaking flasks with 1/5 (liquid/flask  
513 volume) with 200 rpm at 30°C for the estimation of semi-aerobic conditions while 1/10 (liquid/flask  
514 volume) for the aerobic conditions and then enlarged to 500 ml flasks. Additionally, we tested the  
515 scale-up of fermentation volume to 1L, 3L, using a mini jar 5L fermentor (TSC-M5L; Takasugi  
516 Seisakusho, Tokyo, Japan) equipped with a DO controller (DJ-1033; ABLE Corporation, Tokyo,  
517 Japan). The dissolved oxygen was adjusted automatically by the rotation speeds. Cells initially  
518 harvested for fermentation with the same volume of pre-culture YPD medium for ~24 h. The  
519 harvesting carried out by centrifugation at  $6000 \times g$  for 5 min at 4°C and washed with sterile water,  
520 then collected cells were re-supplemented by the Yeast-Peptone (YP) medium with glucose, glycerol  
521 or both, as shown in Figs. 2-4. Different initial concentrations tested to determine fermentation  
522 abilities at those different initial concentrations as well as with the fed patch for an estimate the  
523 maximum tolerance to the product under these unprecedented fermenting conditions. The cell  
524 density monitored using spectrophotometry at 600 nm (AS ONE, China).

525 All analyses estimated using auto-sampling a 10  $\mu$ l to fractionated in an Aminex HPX-87H  
526 column (Bio-Rad Laboratories, Hercules, CA, USA), analyzed in a refractive index detector (RID-  
527 10A; Shimadzu) equipped to auto-sampled Ultra-Fast Liquid Chromatography (UFLC) (Shimadzu,  
528 Japan). Fractionation accomplished with 0.6 ml/min of a mobile phase 5 mM H<sub>2</sub>SO<sub>4</sub> at 50°C.  
529 Reactant concentrations were estimated by monitoring the peak areas compared with the standards  
530 of the authentic reactant's glucose, glycerol, ethanol, and acetic acid.

- 531  
532 **References**  
533  
534 1- Ragauskas, A. J. *et al.* The path forward for biofuels and biomaterials. *Science* 311, 484-489  
535 (2006).
- 536 2- Meadows, A. L. *et al.* Rewriting yeast central carbon metabolism for industrial isoprenoid  
537 production. *Nature* 537, 694-697 (2016).
- 538 3- Lovins, A. B. *et al.* in *Winning the Oil Endgame: Innovation for Profits, Jobs, and Security*, B.  
539 T. Aranow, Ed. (Rocky Mountain Institute, Snowmass, CO, 2004).
- 540 4- Kampf, G., Todt, D., Pfaender, S. & Steinmann, E. Persistence of coronaviruses on inanimate  
541 surfaces and their inactivation with biocidal agents *J. Hosp. Infect.* 104, 246-251 (2020)
- 542 5- Xiberras, J., Klein, M. & Nevoigt, E. Glycerol as a substrate for *Saccharomyces*  
543 *cerevisiae* based bioprocesses – Knowledge gaps regarding the central carbon catabolism of this  
544 ‘non-fermentable’ carbon source. *Biotechnol. Adv.* 37, 107378 (2019).
- 545 6- Peris, D. *et al.* Hybridization and adaptive evolution of diverse *Saccharomyces* species for  
546 cellulosic biofuel production. *Biotechnol. Biofuels* 10:78 (2017).
- 547 7- Khattab, S. M. R. Watanabe, T. Bioethanol from sugarcane bagasse: Status and perspectives, In  
548 Ramesh C. R., Ramachandran S. (Eds.). *Bioethanol Production from Food Crops: Sustainable*  
549 *Sources, Interventions, and Challenges*; Elsevier, pp. 187-212 (2019).
- 550 8- Luque, R., Herrero-Davila, L., Campelo, J. M., Clark, J. H., Hidalgo, J. M., Luna, D., Marinas, J.  
551 M. & Romero, A. A. Biofuels: a technological perspective. *Energy Environ. Sci.* 1, 542–564  
552 (2008)
- 553 9- Deepak, D. & Gregory, S. Relative potential of biosynthetic pathways for biofuels and bio-based  
554 products. *Nat. Biotechnol.* 29, 1074-1078 (2011).



- 555 10- Khattab, S. M. R., Saimura, M. & Kodaki, T. Boost in bioethanol production using recombinant  
556 *Saccharomyces cerevisiae* with mutated strictly NADPH-dependent xylose reductase and  
557 NADP<sup>+</sup>-dependent xylitol dehydrogenase. *J. Biotechnol.* 165, 153-156 (2013).
- 558 11- Khattab, S. M. R. & Kodaki, T. Efficient bioethanol production by overexpression of  
559 endogenous *Saccharomyces cerevisiae* xylulokinase and NADPH-dependent aldose reductase  
560 with mutated strictly NADP<sup>+</sup>-dependent *Pichia stipitis* xylitol dehydrogenase. *Process Biochem.*  
561 49: 1838-1842 (2014).
- 562 12- Wei, N., Quarterman, J., Kim, S. R., Cate, J. H. & Jin, Y. S. Enhanced biofuel production  
563 through coupled acetic acid and xylose consumption by engineered yeast. *Nat Commun.* 4:2580  
564 (2013).
- 565 13- Nomanbhay, S., Hussein, R. & Ong, M. Y. Sustainability of biodiesel production in Malaysia by  
566 production of bio-oil from crude glycerol using microwave pyrolysis: a review. *Green Chem.*  
567 *Lett. Rev.* 11, 135-157 (2018).
- 568 14- Yazdani, S. S. & Gonzalez, R. Anaerobic fermentation of glycerol: a path to economic viability  
569 for the biofuels industry. *Curr. Opin. Biotechnol.* 18, 213-219. (2007).
- 570 15- Sprague, G. F. & Cronan, J. E. Isolation and characterization of *Saccharomyces cerevisiae*  
571 mutants defective in glycerol catabolism. *J. Bacteriol.* 129(3):1335-42 (1977).
- 572 16- Ansell, R., Granath, K., Hohmann, S., Thevelein, J. M. & Adler, L. The two isoenzymes for  
573 yeast NAD<sup>+</sup>-dependent glycerol 3-phosphate dehydrogenase encoded by GPD1 and GPD2 have  
574 distinct roles in osmoadaptation and redox regulation. *EMBO J.* 16(9), 2179-218 (1997).
- 575 17- Grauslund, M. & Ronnow, B. Carbon source-dependent transcriptional regulation of the  
576 mitochondrial glycerol-3-phosphate dehydrogenase gene, GUT2, from *Saccharomyces*  
577 *cerevisiae*. *Can. J. Microbiol.* 46, 1096-1100 (2000).

- 578 18- Grauslund, M., Lopes, J. M. & Ronnow, B. Expression of GUT1, which encodes glycerol kinase  
579 in *Saccharomyces cerevisiae*, is controlled by the positive regulators Adr1p, Ino2p and Ino4p  
580 and the negative regulator Opi1p in a carbon source-dependent fashion. *Nucleic Acids Res.* 27,  
581 4391-4398 (1999).
- 582 19- Turcotte, B., Liang, X. B., Robert, F. & Soontornngun, N. Transcriptional regulation of  
583 nonfermentable carbon utilization in budding yeast. *FEMS Yeast Res.* 10, 2-13 (2010).
- 584 20- Roberts, G. G. & Hudson, A. P. Rsf1p is required for an efficient metabolic shift from  
585 fermentative to glycerol-based respiratory growth in *S. cerevisiae*. *Yeast* 26, 95-110 (2009).
- 586 21- Swinnen, S., Klein, M., Carrillo, M., McInnes, J., Nguyen, H. T. & Nevoigt, E. Re-evaluation of  
587 glycerol utilization in *Saccharomyces cerevisiae*: characterization of an isolate that grows on  
588 glycerol without supporting supplements. *Biotechnol. Biofuels* 6, 157 (2013).
- 589 22- Swinnen, S., Ho, P-W., Klein, M. & Nevoigt, E. Genetic determinants for enhanced glycerol  
590 growth of *Saccharomyces cerevisiae*. *Metab. Eng.* 36, 68-79 (2016).
- 591 23- Ho, P-W., Swinnen, S., Duitama, J. & Nevoigt, E. The sole introduction of two single-point  
592 mutations establishes glycerol utilization in *Saccharomyces cerevisiae* CEN.PK derivatives.  
593 *Biotechnol. Biofuels* 10:10 (2017)
- 594 24- Ochoa-Estopier, A., Lesage, J., Gorret, N. & Guillouet, S. E. Kinetic analysis of a  
595 *Saccharomyces cerevisiae* strain adapted for improved growth on glycerol: implications for the  
596 development of yeast bioprocesses on glycerol. *Bioresour. Technol.* 102(2), 1521-7 (2011).
- 597 25- Klein, M., Carrillo, M., Xiberras, J., Islam, Z-U., Swinnen, S. & Nevoigt, E. Towards the  
598 exploitation of glycerol's high reducing power in *Saccharomyces cerevisiae*-based bioprocesses.  
599 *Metab. Eng.* 38, 464-472 (2016).

- 600 26- Islam, Z-U., Klein, M., Ødum A. S. R. & Nevoigt E. A modular metabolic engineering approach  
601 for the production of 1, 2-propanediol from glycerol by *Saccharomyces cerevisiae*. *Metab. Eng.*  
602 44, 223-35 (2017)
- 603 27- Aßkamp, M. R., Klein, M. & Nevoigt E. *Saccharomyces cerevisiae* exhibiting a modified route  
604 for uptake and catabolism of glycerol forms significant amounts of ethanol from this carbon  
605 source considered as ‘non-fermentable’. *Biotechnol. Biofuels* 12:257 (2019).
- 606 28- Yu, K. O., Kim, S. W. & Han, S. O. Engineering of glycerol utilization pathway for ethanol  
607 production by *Saccharomyces cerevisiae*. *Bioresour Technol.* 101, 4157-4161 (2010).
- 608 29- Semkiv, M., Kata, I., Ternavska, O., Sibirny, W., Dmytruk, K. & Sibirny A Overexpression of  
609 the genes of glycerol catabolism and glycerol facilitator improves glycerol conversion to ethanol  
610 in the methylotrophic thermotolerant yeast *Ogataea polymorpha*. *Yeast* 36, 329-339 (2019).
- 611 30- Ohashi, Y. & Watanabe, T. Catalytic performance of food Additives Alum, flocculating agent,  
612  $Al(SO_4)_3$ ,  $AlCl_3$  and other Lewis acids in microwave solvolysis of hardwoods and recalcitrant  
613 softwood for biorefinery. *ACS Omega*, 3, 16271-16280 (2018).
- 614 31- Yamada-Onodera, K., Yamamoto, H., Emoto, E., Kawahara, N. & Tani, Y. Charaterisation of  
615 glycerol dehydrogenase from a methylotrophic yeast *Hansenula polymorpha* DL-1, and its gene  
616 cloning. *Acta. Biotechnol.* 22, 337-353 (2002).
- 617 32- Klein, M., Islam, Z-U., Knudsen, P. B., Carrillo, M., Swinnen, S., Workman, M. & Nevoigt, E.  
618 The expression of glycerol facilitators from various yeast species improves growth on glycerol of  
619 *Saccharomyces cerevisiae*. *Metab. Eng. Commun.* 3, 252-257 (2016).
- 620 33- Ito, Y., Yamanishi, M., Ikeuchi, A., Imamura, C., Tokuhiko, K., Kitagawa, T. & Matsuyama, T.  
621 Characterization of five terminator regions that increase the protein yield of a transgene in  
622 *Saccharomyces cerevisiae* *J. Biotechnol.* 168, 486-492 (2013)

- 623 34- Yamanishi, M., Ito, Y., Kintaka, R., Imamura, C., Katahira, S., Ikeuchi, A., Moriya, H.  
624 & Matsuyama, T. A genome-wide activity assessment of terminator regions in *Saccharomyces*  
625 *cerevisiae* provides a "terminatome" toolbox. *ACS Synth. Biol.* 2013, 2, 337–347
- 626 35- Ito, Y., Kitagawa, T., Yamanishi, M., Katahira, S., Izawa, S., Irie, K., Furutani-Seiki, M. &  
627 Matsuyama, T.. Enhancement of protein production via the strong DIT1 terminator and two  
628 RNA-binding proteins in *Saccharomyces cerevisiae*, *Sci. Rep.* 6, 36997 (2016).
- 629 36- Wei, L., Wang, Z., Zhang, G., Ye, B. Characterization of Terminators in *Saccharomyces*  
630 *cerevisiae* and an Exploration of Factors Affecting Their Strength. *Chem. Bio. Chem.* 18, 2422-  
631 2427 (2017)
- 632 37- Hosaka, K., Nikawa, J., Kodaki, T. & Yamashita, S. A dominant mutation that alters the  
633 regulation of INO1 expression in *Saccharomyces cerevisiae*. *J. Biochem.* 111, 352-358 (1992).
- 634 38- Kodaki, T. & Yamashita, S. Characterization of the methyltransferases in the yeast  
635 phosphatidylethanolamine methylation pathway by selective gene disruption *Eur. J. Biochem.*  
636 185, 243-251 (1989).
- 637 39- Hosaka, K., Murakami, T., Kodaki, T., Nikawa, J. & Yamashita, S. Repression of Choline  
638 Kinase by Inositol and Choline in *Saccharomyces cerevisiae*. *J. Bacteriol.*, 172(4), 2005-12  
639 (1990).
- 640 40- Overkamp, K. M., Bakker, B. M., Kötter, P., Luttik, M. A. H., Johannes P. van Dijken, J. P. &  
641 Pronk, J. T. Metabolic Engineering of Glycerol Production in *Saccharomyces cerevisiae*. *Appl.*  
642 *Environ. Microbiol.* 68(6), 2814-2821 (2002).
- 643 41- Nguyen, H. T. & Nevoigt, E. Engineering of *Saccharomyces cerevisiae* for the production of  
644 dihydroxyacetone (DHA) from sugars: A proof of concept. *Metab. Eng.* 11, 335-346 (2009).
- 645 42- Saito, H. & Posas, F. Response to Hyperosmotic Stress, *Genetics*, 192, 289-318 (2012).

- 646 43- Babazadeh, R., Lahtvee, P. J., Adiels, C. B., Goksör, M., Nielsen, J. B. & Hohmann, S. The yeast  
647 osmostress response is carbon source dependent. *Sci. Rep.* 7: 990 (2017).
- 648 44- Vemuri, G. N., Eiteman, M. A., McEwen, J. E., Olsson, L. & Nielsen, J. Increasing NADH  
649 oxidation reduces overflow metabolism in *Saccharomyces cerevisiae*. *Proc. Natl. Acad. Sci.* 104,  
650 2402-2407 (2007).
- 651 45- Zheng, Z. & Zou, J. The initial step of the glycerolipid pathway: identification of glycerol 3-  
652 phosphate/dihydroxyacetone phosphate dual substrate acyltransferases in *Saccharomyces*  
653 *cerevisiae*. *J. Biol. Chem.* 276, 41710-41716 (2001).
- 654 46- Murata, K. Fukuda, Y. Watanabe, K. Saikusa, T. Shimosaka, M. & Kimura, A. Characterization  
655 of methylglyoxal synthase in *Saccharomyces cerevisiae*. *Biochem. Biophys. Res. Commun.* 131,  
656 190-198 (1985).
- 657 47- Larsson, C., Pålman, I. L., Ansell, R., Rigoulet, M., Adler, L. & Gustafsson, L. The  
658 importance of the glycerol 3-phosphate shuttle during aerobic growth of *Saccharomyces*  
659 *cerevisiae*. *Yeast.* 15, 14(4): 347-357 (1998)
- 660 48- Gancedo, C., Gancedo, J.M. & Sols, A. Glycerol metabolism in yeasts pathways of utilization  
661 and production. *Eur. J. Biochem.* 5, 165-172 (1968).
- 662 49- Molin, M., Norbeck, J. & Blomberg, A. Dihydroxyacetone kinases in *saccharomyces cerevisiae*  
663 are involved in detoxification of dihydroxyacetone. *The J. Biol. Chem.* 278, 1415-1423 (2003).
- 664 50- Grüning, N. M., Du, D., Keller, M. A., Luisi, B. F. & Ralser, M. Inhibition of triosephosphate  
665 isomerase by phosphoenolpyruvate in the feedback-regulation of glycolysis. *Open Biol.* 4:  
666 130232 (2014).

- 667 51- Shi, Y., Vaden, D. L., Ju, S., Ding, D., Geiger, J. H. & Greenberg, M. L. Genetic perturbation of  
668 glycolysis results in inhibition of de novo inositol biosynthesis. *J. Biol. Chem.* 280(51), 41805-  
669 41810 (2005).
- 670 52- Yazdani, S. S. & Gonzalez, R. Engineering *Escherichia coli* for the efficient conversion of  
671 glycerol to ethanol and co-products. *Metab. Eng.* 10, 340-351 (2008).
- 672 53- Trinh, C. T. & Sreenc, F. Metabolic engineering of *Escherichia coli* for efficient conversion of  
673 glycerol to ethanol. *Appl. Environ. Microbiol.* 75, 6696-6705 (2009).
- 674 54- Loaces, I. Rodríguez, C. Amarelle, V. Fabiano, E. & Noya, F. Improved glycerol to ethanol  
675 conversion by *E. coli* using a metagenomic fragment isolated from an anaerobic reactor. *J. Ind.*  
676 *Microbiol. Biotechnol.* 43, 1405-1416 (2016).
- 677 55- STATISTA. Fuel ethanol production worldwide in 2018, by country.  
678 <https://www.statista.com/statistics/281606/ethanol-production-in-selected-countries/>
- 679 56- World bioenergy association. WBA Global Bioenergy Statistics 2018  
680 [https://worldbioenergy.org/uploads/181203%20WBA%20GBS%202018\\_hq.pdf](https://worldbioenergy.org/uploads/181203%20WBA%20GBS%202018_hq.pdf)
- 681 57- World Fuel Ethanol Production – Renewable Fuels Association 2018.  
682 <https://ethanolrfa.org/statistics/annual-ethanol-production/>
- 683 58- Kang, Y. S., Kane, J., Kurjan, J., Stadel, J. M. & Tipper, D. J. Effects of expression of  
684 mammalian G alpha and hybrid mammalian-yeast G alpha proteins on the yeast pheromone  
685 response signal transduction pathway. *Mol. Cell. Biol.* 10, 2582-2590 (1990).
- 686 59- Rose, M. D. & Broach, J. R. Cloning genes by complementation in yeast. *Methods Enzymol.* 194,  
687 195-230 (1991).
- 688 60- Ryan, et al. Selection of chromosomal DNA libraries using a multiplex CRISPR system. *eLife.* 3,  
689 e03703 (2014).

690 61- Naito, Y. Hino, K. Bono, H. Ui-Tei, K. CRISPRdirect: software for designing CRISPR/Cas  
 691 guide RNA with reduced off-target sites. *J. Bioinform.* 31, 1120-1123 (2015).  
 692 62- Ryan, O. W. Poddar, S. & Cate, J. H. CRISPR–Cas9 Genome engineering in *Saccharomyces*  
 693 *cerevisiae* cells. *Cold Spring Harbor Protocol* (2016).

694

695 **Figures and Tables**

696

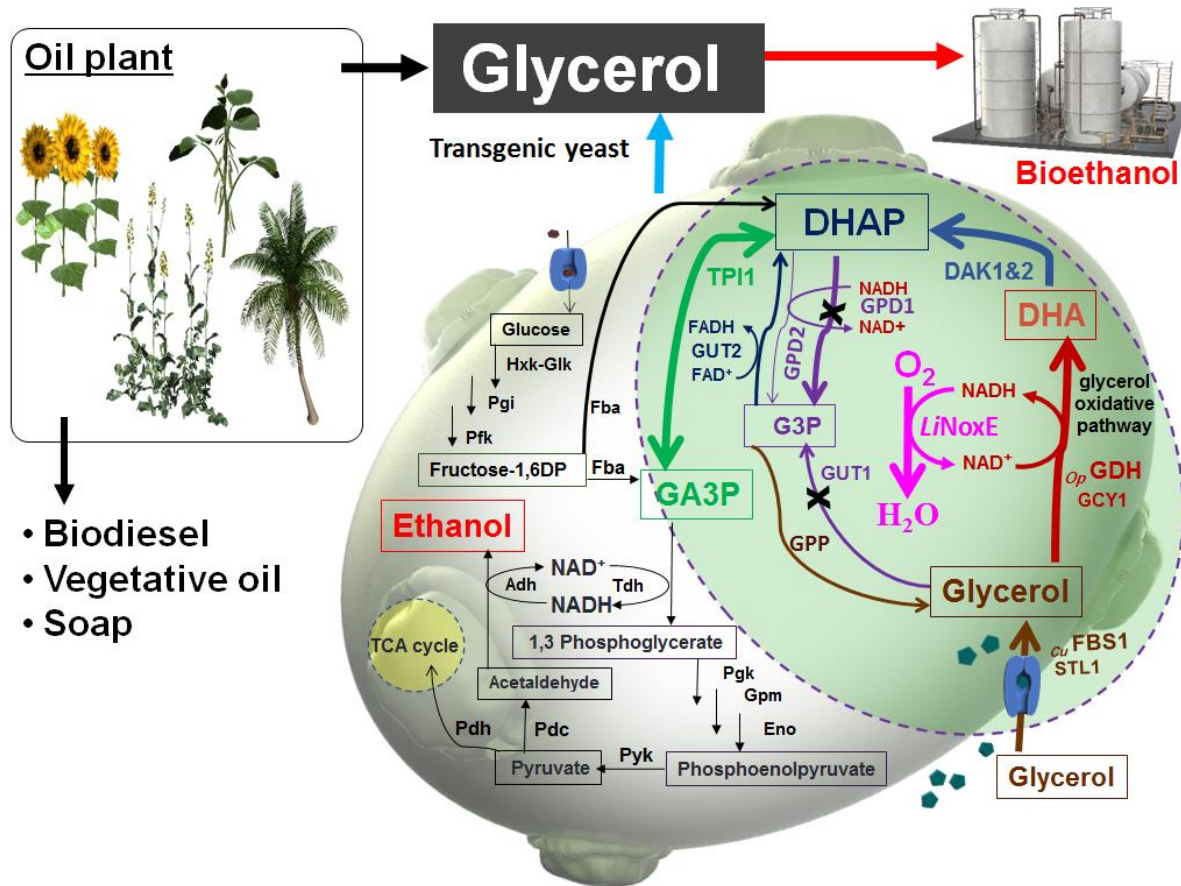

697

698 Fig.1. Schematic diagram showing the integrative scenario of biorefinery with a new generation  
 699 of glycerol fermenting yeast, and redirection of glycerol influxes to ethanol production  
 700 in *Saccharomyces cerevisiae* via retrofitted native glycerol anabolic and catabolic pathways with  
 701 the robust oxidative route with renovation  $NAD^+$  cofactor by  $O_2$ -dependent dynamic of water-  
 702 forming NADH oxidase. During the pathway re-routing, glycerol-3-phosphate dehydrogenase  
 703 (GPD1) and glycerol kinase (GUT1) were knocked out, bold arrows showing the overexpressed

704 enzymes indigenous dihydroxyacetone kinase (*ScDAK1&2*), triosephosphate isomerase (*ScTPI1*),  
705 heterologous glycerol dehydrogenase from *Ogataea polymorpha* (*OpGDH*), glycerol facilitator  
706 from *Candida utilis* (*CuFPS1*) and water-forming NADH oxidase from *Lactococcus lactis* subsp.  
707 *lactis* II1403 (*LINoxE*).  
708



709 Table 1: Characteristics of *S. cerevisiae* strains generated through this study  
 710  
 711

| <i>S. cerevisiae</i> strain                   | Relevant genotype                                                                                                                                                                                                                                                                                                                              | reference  |
|-----------------------------------------------|------------------------------------------------------------------------------------------------------------------------------------------------------------------------------------------------------------------------------------------------------------------------------------------------------------------------------------------------|------------|
| D452-2                                        | MATa leu2 his3 ura3 can1                                                                                                                                                                                                                                                                                                                       | (37)       |
| GF2                                           | D452-2, HIS3:: pPGKp&t- <i>ScTPI1</i> , <i>ScDAK2</i> , <i>ScDAK1 ScGCY1</i> , <i>ScSTL</i>                                                                                                                                                                                                                                                    | this study |
| GA2                                           | D452-2, HIS3:: pPGKp&t- <i>ScTPI1</i> , <i>ScGUT2</i> , <i>ScGUT1</i> , <i>ScSTL1</i>                                                                                                                                                                                                                                                          | this study |
| GDH                                           | D452-2, URA3:: TDH3p- <i>OpGDH</i> -d22-DIT1t                                                                                                                                                                                                                                                                                                  | this study |
| ΔGPD1                                         | D452-2, ΔGPD1:: TDH3p-d22-DIT1t                                                                                                                                                                                                                                                                                                                | this study |
| GPD1/ <i>L</i> /NoxE                          | D452-2, ΔGPD1:: TDH3p- <i>L</i> /NoxE-d22-DIT1t                                                                                                                                                                                                                                                                                                | this study |
| ΔGPD2                                         | D452-2, ΔGPD2:: TDH3p-d22-DIT1t                                                                                                                                                                                                                                                                                                                | this study |
| GPD2/ <i>L</i> /NoxE                          | D452-2, ΔGPD2:: TDH3p- <i>L</i> /NoxE-d22-DIT1t                                                                                                                                                                                                                                                                                                | this study |
| ΔGPD1, ΔGPD2                                  | D452-2, ΔGPD1:: TDH3p-d22-DIT1t; ΔGPD2: TDH3p-d22-DIT1t                                                                                                                                                                                                                                                                                        | this study |
| GPD1/ <i>L</i> /NoxE+<br>GPD2/ <i>L</i> /NoxE | D452-2, ΔGPD1:: TDH3p- <i>L</i> /NoxE-d22-DIT1t; ΔGPD2::TDH3p- <i>L</i> /NoxE-d22-DIT1t                                                                                                                                                                                                                                                        | this study |
| GPD1/ <i>L</i> /NoxE+ ΔGPD2                   | D452-2, ΔGPD1:: TDH3p- <i>L</i> /NoxE-d22-DIT1t; ΔGPD2::TDH3p-d22-DIT1t                                                                                                                                                                                                                                                                        | this study |
| ΔGPD1+ GPD2/ <i>L</i> /NoxE                   | D452-2, ΔGPD1:: TDH3p-d22-DIT1t; ΔGPD2::TDH3p- <i>L</i> /NoxE-d22-DIT1t                                                                                                                                                                                                                                                                        | this study |
| NoxE/URA3                                     | D452-2, URA3:: TDH3p- <i>L</i> /NoxE-d22-DIT1t                                                                                                                                                                                                                                                                                                 | this study |
| GDH+NOXE                                      | D452-2, URA3:: TDH3p- <i>OpGDH</i> -d22-DIT1t; ΔGPD1:: TDH3p- <i>L</i> /NoxE-d22-DIT1t                                                                                                                                                                                                                                                         | this study |
| GDH+NOXE+FDT                                  | D452-2, URA3:: TDH3p- <i>OpGDH</i> -d22-DIT1t; ΔGPD1:: TDH3p- <i>L</i> /NoxE-d22-DIT1t; AUR1-C:: PGKp- <i>CuFPS1</i> -RPL41Bt; PGKp- <i>ScTPI1</i> -PGKt; PGKp- <i>ScDAK2</i> -PGKt; PGKp- <i>ScDAK1</i> -PGKt.                                                                                                                                | this study |
| GDH+NOXE+FDT+M1<br>(SK-FGG)                   | D452-2, URA3:: TDH3p- <i>OpGDH</i> -d22-DIT1t; ΔGPD1:: TDH3p- <i>L</i> /NoxE-d22-DIT1t; AUR1-C:: PGKp- <i>CuFPS1</i> -RPL41Bt; PGKp- <i>ScTPI1</i> -PGKt; PGKp- <i>ScDAK2</i> -PGKt; PGKp- <i>ScDAK1</i> -PGKt; ΔGUT1:: TEFp- <i>CuFPS1</i> -CYC1t; TYS1p- <i>OpGDH</i> -ATP15t; TDH3p- <i>ScDAK1</i> -d22-DIT1t; FBA1p- <i>ScTPI1</i> -TDH3t. | this study |

712

713

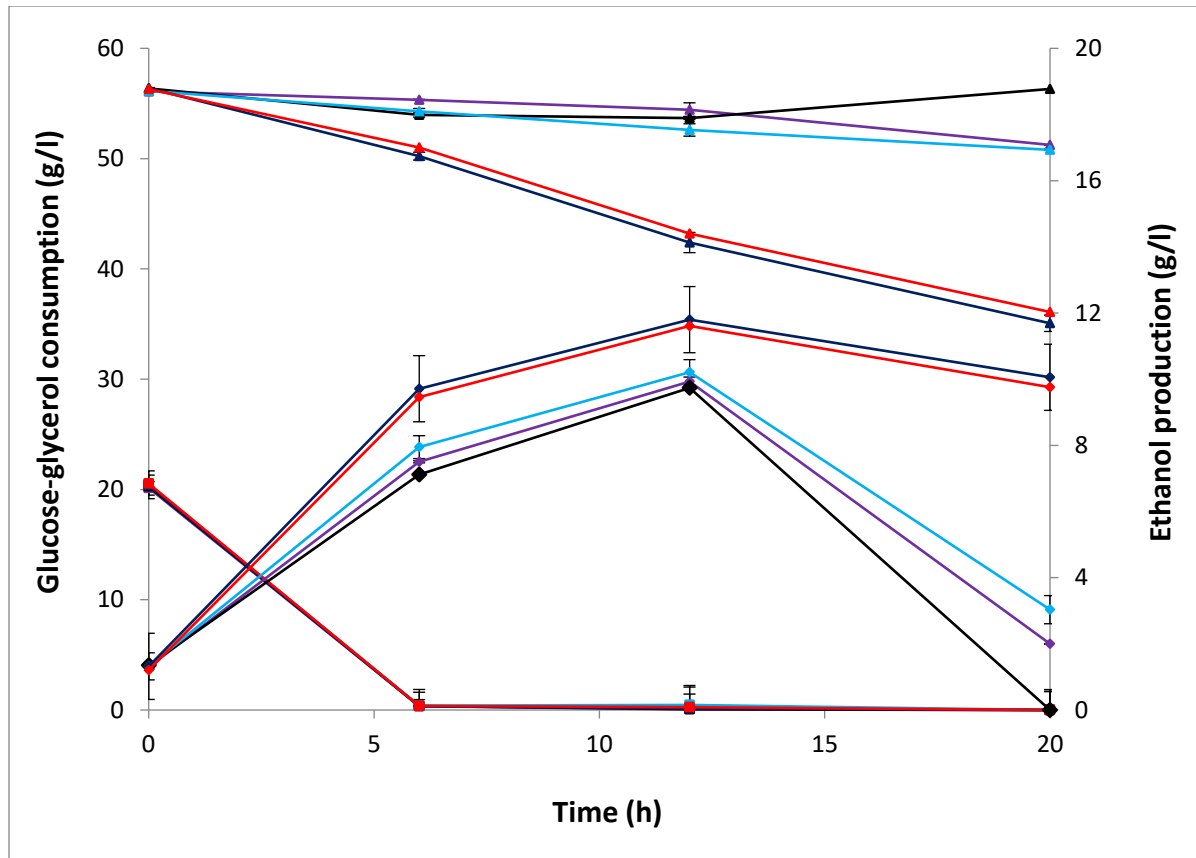

714

715 Fig.2. Time course for fermentation of glucose-glycerol by *S. cerevisiae*: ancestor (black lines  
716 colour); GF2 strain, overexpressing endogenous oxidative (DHA) pathways STL1, GCY1, DAK1,  
717 DAK2 and TPI1 (azure lines colour); GA2 strain, overexpressing endogenous assimilative (G3P)  
718 pathways STL1, GUT1, GUT2 and TPI1 (purple lines colour);GDH strain overexpressing  
719 glycerol dehydrogenase from *Ogataea polymorpha* *op*GDH (blue lines colour); ΔGUT1-GDH  
720 (Red lines colour);glucose consumption (square symbols), glycerol consumption (triangular  
721 symbols) and ethanol production (rhomboid symbols). Data obtained from the mean of three  
722 independent experiments run at the time to decrease time-differences of sampling. Error bars  
723 represent the standard deviation of the mean and are not visible when smaller than the symbol  
724 size. We omitted the data indicated for fermenting the only YP due to the overlapped with the  
725 horizontal axis (YP in the medium was not converted to ethanol here).

726

| Relevant strain      | Glycerol secreted (g) | Acetic secreted (g) | Ethanol produced (g) | Ethanol yield g/ g glucose | Consumed glucose (g) | Optical density (OD) |
|----------------------|-----------------------|---------------------|----------------------|----------------------------|----------------------|----------------------|
| WT                   | 2.56±0.06             | 1.46±0.06           | 42.67±0.53           | 0.431±0.54                 | 99.01±1.660          | 13.84±0.21           |
| ΔGPD1                | 0.47±0.07             | 1.66±0.07           | 45.78±1.09           | 0.455±1.11                 | 100.58±2.20          | 18.10±0.21           |
| ΔGPD2                | 2.08±0.05             | 1.87±0.05           | 44.74±0.88           | 0.446±0.90                 | 100.18±1.10          | 17.55±0.20           |
| ΔGPD1+ ΔGPD2         | 0.10±0.01             | 1.85±0.03           | 43.04±0.93           | 0.436±0.95                 | 98.81±0.630          | 16.81±0.17           |
| NoxE/GPD1            | 0.14±0.01             | 2.81±0.08           | 47.92±0.93           | 0.474±0.96                 | 100.97±1.33          | 16.22±0.19           |
| NoxE/GPD2            | 1.82±0.05             | 1.96±0.06           | 44.27±0.78           | 0.43±0.810                 | 102.34±1.24          | 16.53±0.27           |
| NoxE/GPD1+ NoxE/GPD2 | ND*                   | 3.59±0.11           | 36.24±0.60           | 0.429±0.62                 | 84.36±2.020          | 11.71±0.19           |
| NoxE/GPD1+ ΔGPD2     | 0.11±0.01             | 2.60±0.09           | 35.25±0.61           | 0.437±0.63                 | 80.7±2.2530          | 13.04±0.18           |
| NoxE/GPD2+ ΔGPD1     | 0.11±0.02             | 2.77±0.06           | 43.25±0.86           | 0.435±0.87                 | 99.28±2.110          | 13.73±0.19           |
| NoxE/URA3            | 1.53±0.06             | 2.93±0.06           | 43.40±0.77           | 0.43±0.820                 | 99.7±1.3230          | 18.43±0.13           |

727

728 **Table 2 shows;** glycerol secretion, acetate accumulation, ethanol production, ethanol yield rate,  
729 total glucose consumed and maximum growth (optical density OD) 20 h of ferment 10 % glucose  
730 as a sole provided carbon to YP medium under semi-aerobic conditions by the recombinant  
731 strains studied here for rewriting NADH cycles by water-forming NADH oxidase. Errors  
732 represent the deviation of the mean. Semi-aerobic (shaking flasks with 1/5 liquid culture/ flask  
733 volume at 150 rpm). \* Not detected.

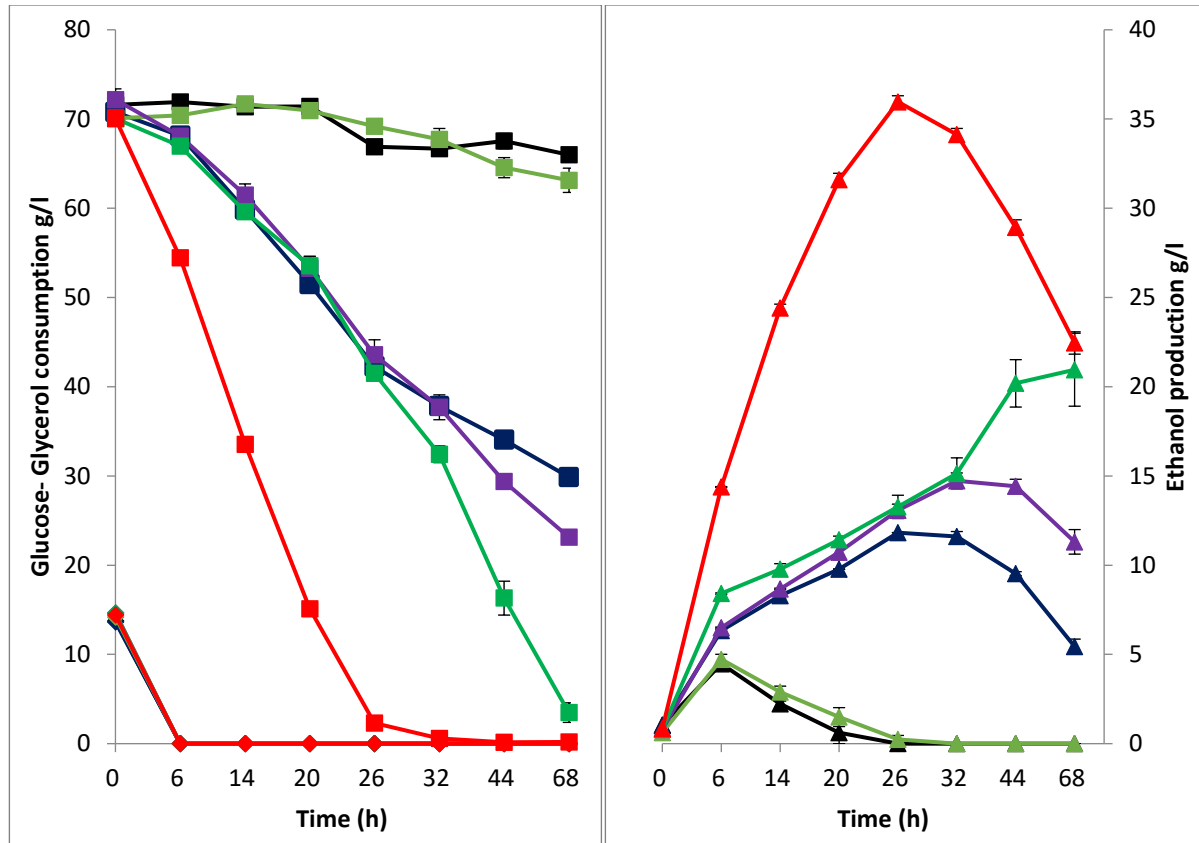

734  
735 Fig.3. Comparison of the time course of glycerol–glucose fermentation between evolved *S.*  
736 *cerevisiae* strains during this study: ancestor, (black lines colour); NOXE/GPD1 strain (orange  
737 lines colour); GDH strain (blue lines colour); GDH-NOXE strain (purple lines colour); GDH-  
738 NOXE-FDT strain (green lines colour); (SK-FGG), GDH-NOXE-FDT-M1 (red lines colour); (A)  
739 Glucose consumption (rhomboid symbols), glycerol consumption (square symbols); (B) ethanol  
740 production (triangular symbols). Fermentation carried out in aerobic conditions in shaking flasks,  
741 1/10 liquid culture/flask volume at 30°C with 180 rpm. Data obtained from the mean of three  
742 independent experiments run at the time to decrease time-differences of sampling. Error bars  
743 represent the standard deviation of the mean and are not visible when smaller than the symbol  
744 size. We omitted the data indicated for fermenting the only YP due to the overlapped with the  
745 horizontal axis (YP in the medium was not converted to ethanol here).

746

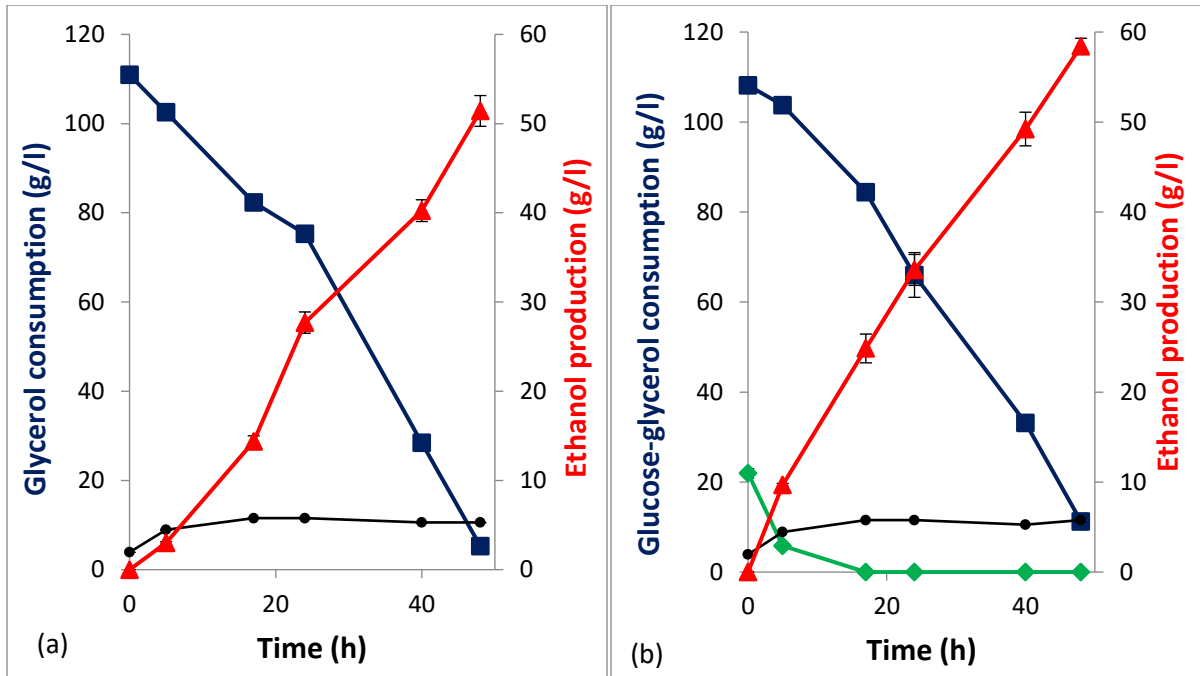

747

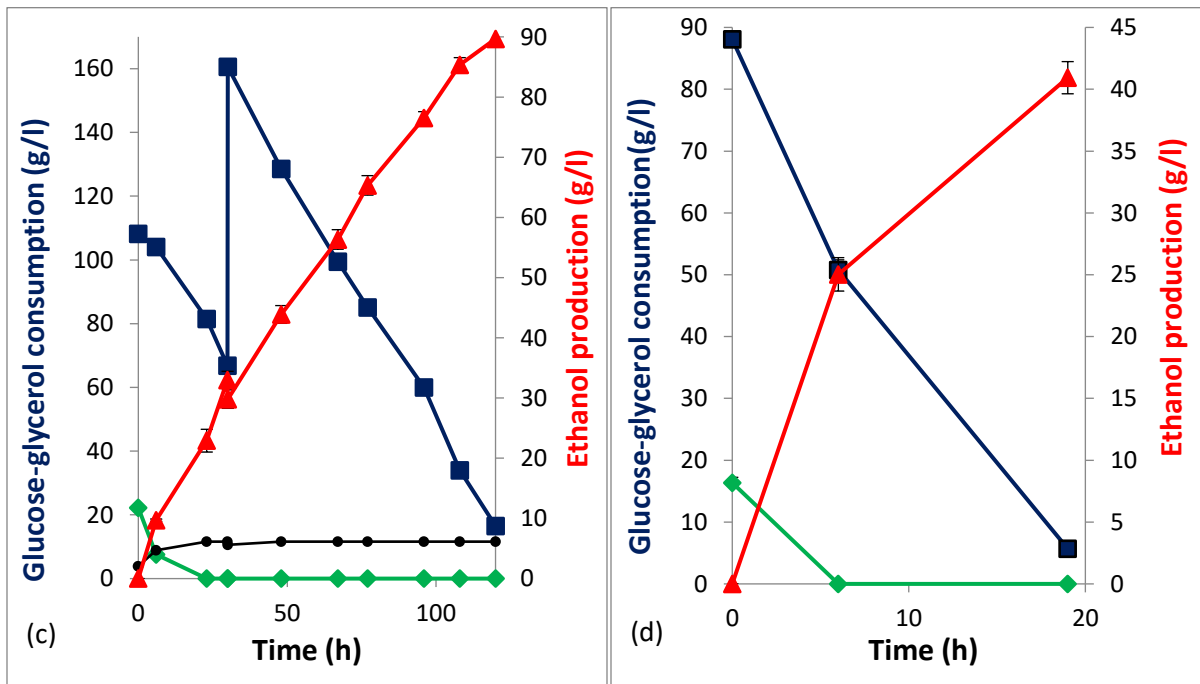

751

748 Fig.4. Time course of aerobic fermentation by glycerol fermentation of recombinant strain SK-  
749 FGG: glycerol consumption (blue lines colour with square symbols); Glucose consumption (green  
750 lines colour with rhomboid symbols); Ethanol production (red lines colour with triangular  
751 symbols); cell density (OD600) (black lines colour with circle symbols); (A) sole glycerol. (B)

752 Mixed glucose and glycerol. (C) Mixed glucose and glycerol with glycerol fed-batching.  
 753 Fermentation carried out in aerobic conditions in shaking flasks; 1/10 liquid culture/flask volume  
 754 for (A), (B) and (C) and 1/30 liquid culture/flask volume for (D) at 30°C with 200 rpm. Data  
 755 obtained from the mean of three independent experiments run at the time to decrease time-  
 756 differences of sampling. Error bars represent the standard deviation of the mean and are not  
 757 visible when smaller than the symbol size. We omitted the data indicated for fermenting the only  
 758 YP due to the overlapped with the horizontal axis (YP in the medium was not converted to  
 759 ethanol here).

760

761 Table 3: Constructed plasmids used in this study

| Plasmid                                  | Relevant genotype                                 | Source or reference |
|------------------------------------------|---------------------------------------------------|---------------------|
| 1-pPGK URA3,                             | PGK promoter and terminator                       | (58)                |
| 2-pHV1                                   | HIS3                                              | (59)                |
| 3-pPGK                                   | HIS3, PGK promoter and terminator                 | this study          |
| 4-pPGK-ScSTL                             | URA3, expression of ScSTL                         | this study          |
| 5-pPGK-ScGCY1                            | URA3, expression of ScGCY1                        | this study          |
| 6-pPGK-ScDAK1                            | URA3, expression of ScDAK1                        | this study          |
| 7-pPGK-ScDAK2                            | URA3, expression of ScDAK2                        | this study          |
| 8-pPGK-ScTPI1                            | URA3, expression of ScTPI1                        | this study          |
| 9-pPGK-ScTPI1                            | HIS3, expression of ScTPI                         | this study          |
| 10-pPGK-ScTPI1, ScDAK2                   | HIS3, expression of ScTPI1, ScDAK2                | this study          |
| 11-pPGK-ScTPI1, ScDAK2, ScDAK1           | HIS3, expression of ScTPI1, ScDAK2, ScDAK         | this study          |
| 12-pPGK-ScTPI1, ScDAK2, ScDAK1<br>ScGCY1 | HIS3, expression of ScTPI1, ScDAK2, ScDAK1 ScGCY1 | this study          |

|                                                                                         |                                                                                                    |                 |
|-----------------------------------------------------------------------------------------|----------------------------------------------------------------------------------------------------|-----------------|
| 13-pPGK- <i>ScTPI1</i> , <i>ScDAK2</i> , <i>ScDAK1</i><br><i>ScGCY1</i> , <i>ScSTL1</i> | HIS3, expression of <i>ScTPI1</i> , <i>ScDAK2</i> , <i>ScDAK1</i> <i>ScGCY1</i> ,<br><i>ScSTL1</i> | this study      |
| 14-pPGK- <i>ScTPI1</i> , <i>ScDAK2</i> , <i>ScDAK1</i><br><i>ScGCY1</i> , <i>ScSTL1</i> | HIS3, expression of <i>ScTPI1</i> , <i>ScDAK2</i> , <i>ScDAK1</i> <i>ScGCY1</i> ,<br><i>ScSTL1</i> | this study      |
| 15-pPGK- <i>ScGUT1</i>                                                                  | URA3, expression of <i>ScGUT1</i>                                                                  | this study      |
| 16-pPGK- <i>ScGUT2</i>                                                                  | URA3, expression of <i>ScGUT1</i>                                                                  | this study      |
| 17-pPGK- <i>ScTPI1</i> , <i>ScGUT2</i>                                                  | HIS3, expression of <i>ScTPI1</i> , <i>ScGUT2</i>                                                  | this study      |
| 18-pPGK- <i>ScTPI1</i> , <i>ScGUT2</i> , <i>ScGUT1</i>                                  | HIS3, expression of <i>ScTPI1</i> , <i>ScGUT2</i> , <i>ScGUT1</i>                                  | this study      |
| 19-pPGK- <i>ScTPI1</i> , <i>ScGUT2</i> , <i>ScGUT1</i> ,<br><i>ScSTL1</i>               | HIS3, expression of <i>ScTPI1</i> , <i>ScGUT2</i> , <i>ScGUT1</i> , <i>ScSTL1</i>                  | this study      |
| 20-TDH3-d22                                                                             | URA3, TDH3 promoter and d22DIT1 terminator                                                         | this study      |
| 21-TDH3-d22-opGDH                                                                       | URA3, expression of <i>OpGDH</i>                                                                   | this study      |
| 22-TDH3-d22-LINoxE                                                                      | URA3, expression of <i>LINoxE</i>                                                                  | this study      |
| 23-pPGK-RPL41Bt                                                                         | URA3, PGK promoter and RPL41Bt terminator                                                          | this study      |
| 24-pPGK-RPL41Bt- <i>LINoxE</i>                                                          | URA3, expression of <i>LINoxE</i>                                                                  | this study      |
| 25-pAUR101                                                                              | AUR1-c (control plasmid)                                                                           | Takara Bio      |
| 26-pAUR101- <i>CuFPS1</i>                                                               | AUR1-C expression of <i>CuFPS1</i>                                                                 | this study      |
| 27-pAUR101- <i>CuFPS1</i> , <i>ScTPI1</i> ,<br><i>ScDAK2</i> , <i>ScDAK1</i>            | AUR1-C expression of <i>CuFPS1</i> , <i>ScTPI1</i> , <i>ScDAK2</i> ,<br><i>ScDAK1</i>              | this study      |
| 28- pAUR101- <i>CuFPS1</i> , <i>OpGDH</i> ,<br><i>ScDAK1</i> , <i>ScTPI1</i>            | AUR1-C expression of <i>CuFPS1</i> , <i>OpGDH</i> , <i>ScDAK1</i> ,<br><i>ScTPI1</i>               | this study      |
| 29-pCAS-60847                                                                           | Expresses <i>S. pyogenes</i> Cas9 plus an HDV ribozyme-<br>sgRNA                                   | Addgene<br>(60) |
| 30-pCAS/GPD1                                                                            | Expresses Cas9 + sgRNA target GPD1                                                                 | this study      |
| 31-pCAS/GPD1                                                                            | Expresses Cas9 + sgRNA target GPD2                                                                 | this study      |
| 32-pCAS/GUT1                                                                            | Expresses Cas9 + sgRNA target GUT1                                                                 | this study      |

763 Supplementary Materials

764

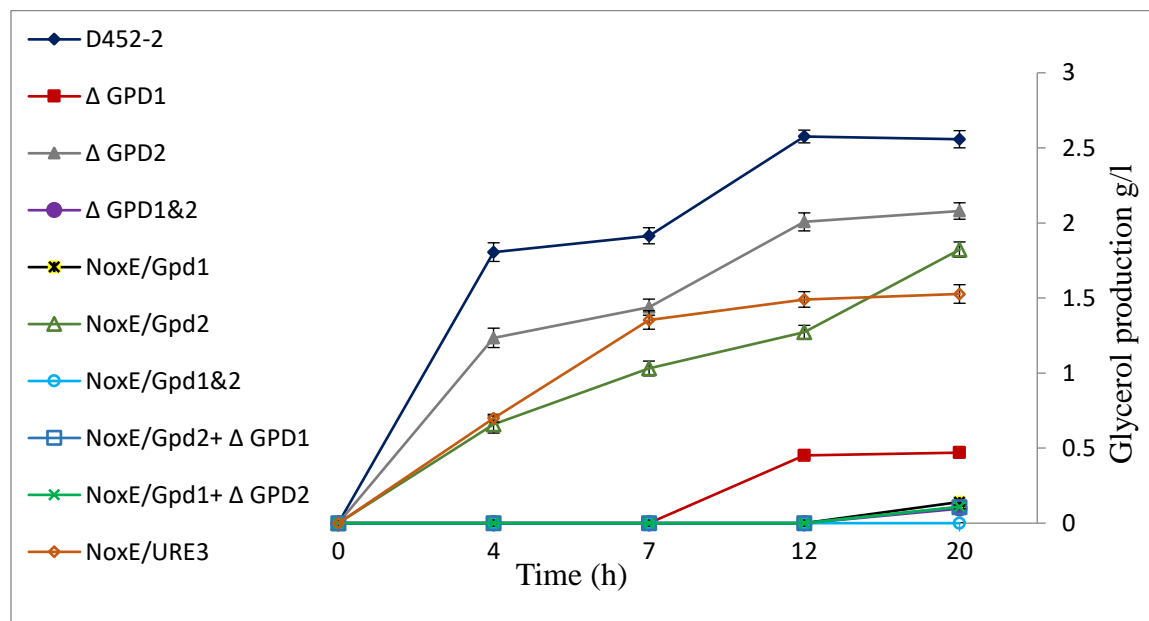

765

766 (a)

767

768

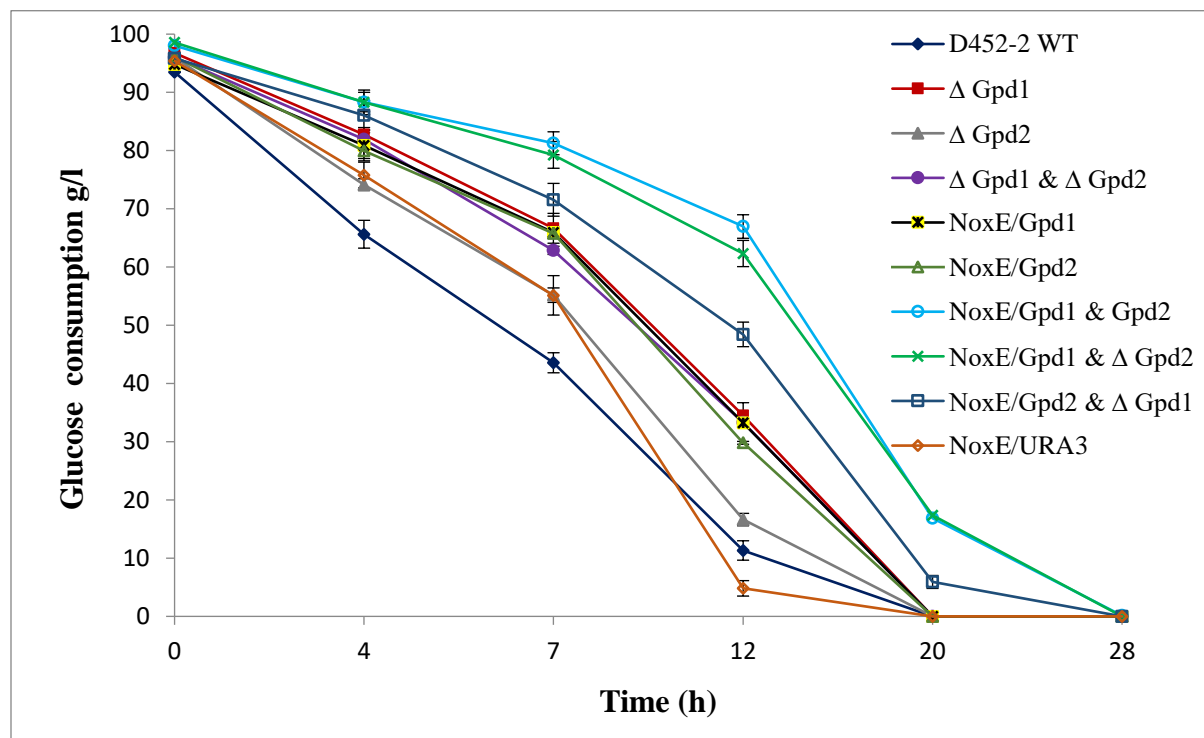

769

770 (b)

771



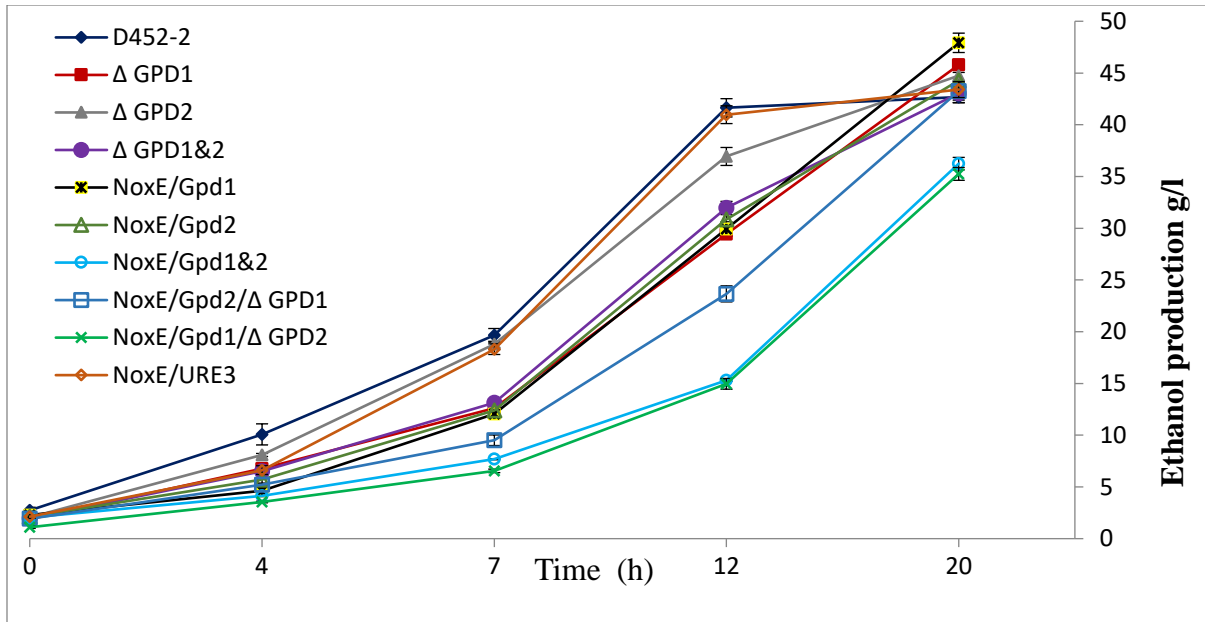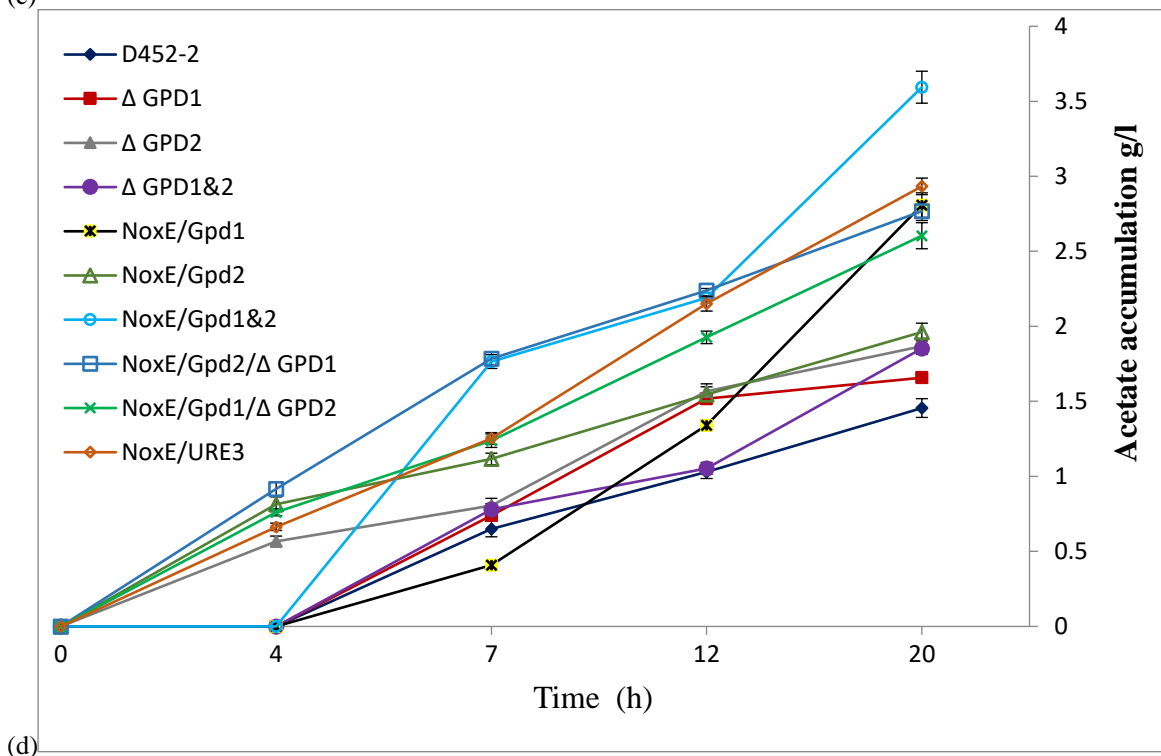

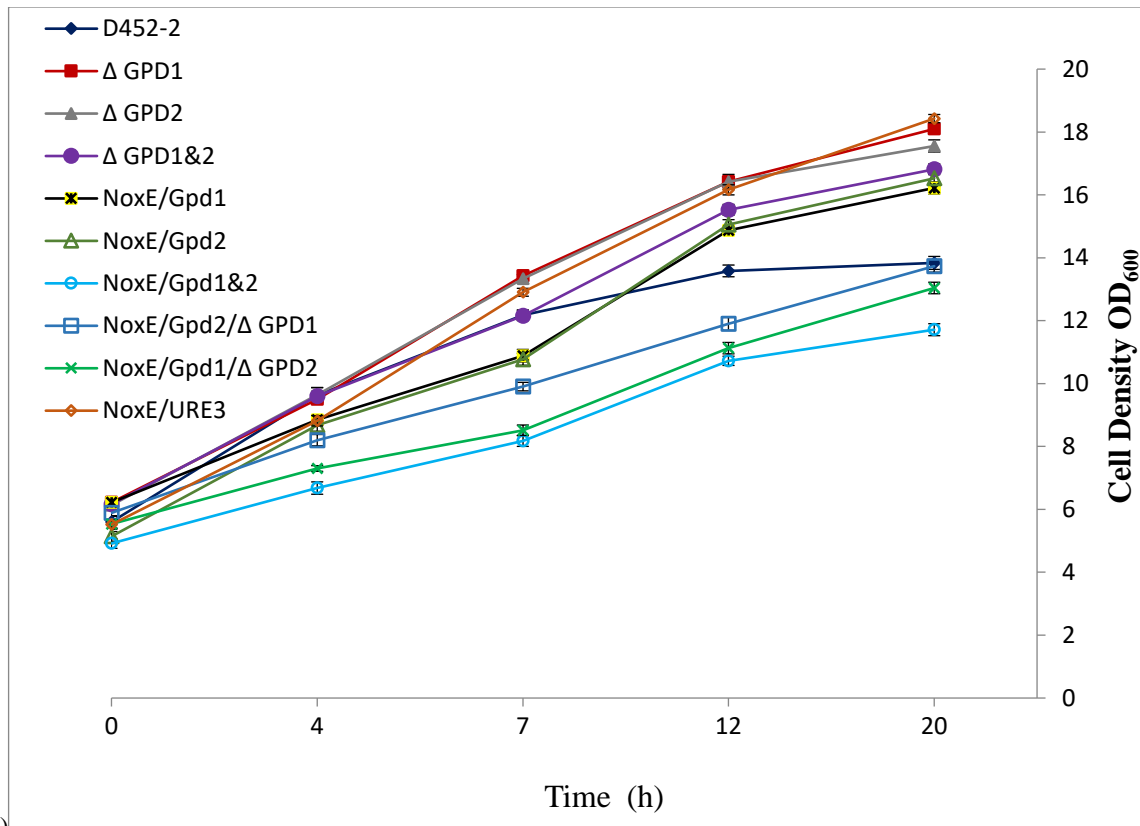

775  
776

777 **Fig. S1. Time course for the comparative study of different recombinant *S. cerevisiae* under fermentation of**  
778 **10% glucose at 30 °C and 150 rpm (1/5 liquid culture/flask volume).** Data obtained from the mean of two  
779 independent experiments, (a) Glycerol production, (b) glucose consumption, (c) ethanol production, (d) acetate  
780 accumulation and (e) cell density (OD<sub>600</sub>). Data obtained from the mean of three independent  
781 experiments run at the time to decrease time-differences of sampling. Data obtained from the  
782 mean of three independent experiments run at the time to decrease time-differences of sampling.  
783 Error bars represent the standard deviation of the mean and are not visible when smaller than the  
784 symbol size. We omitted the data indicated for fermenting the only YP due to the overlapped with  
785 the horizontal axis.

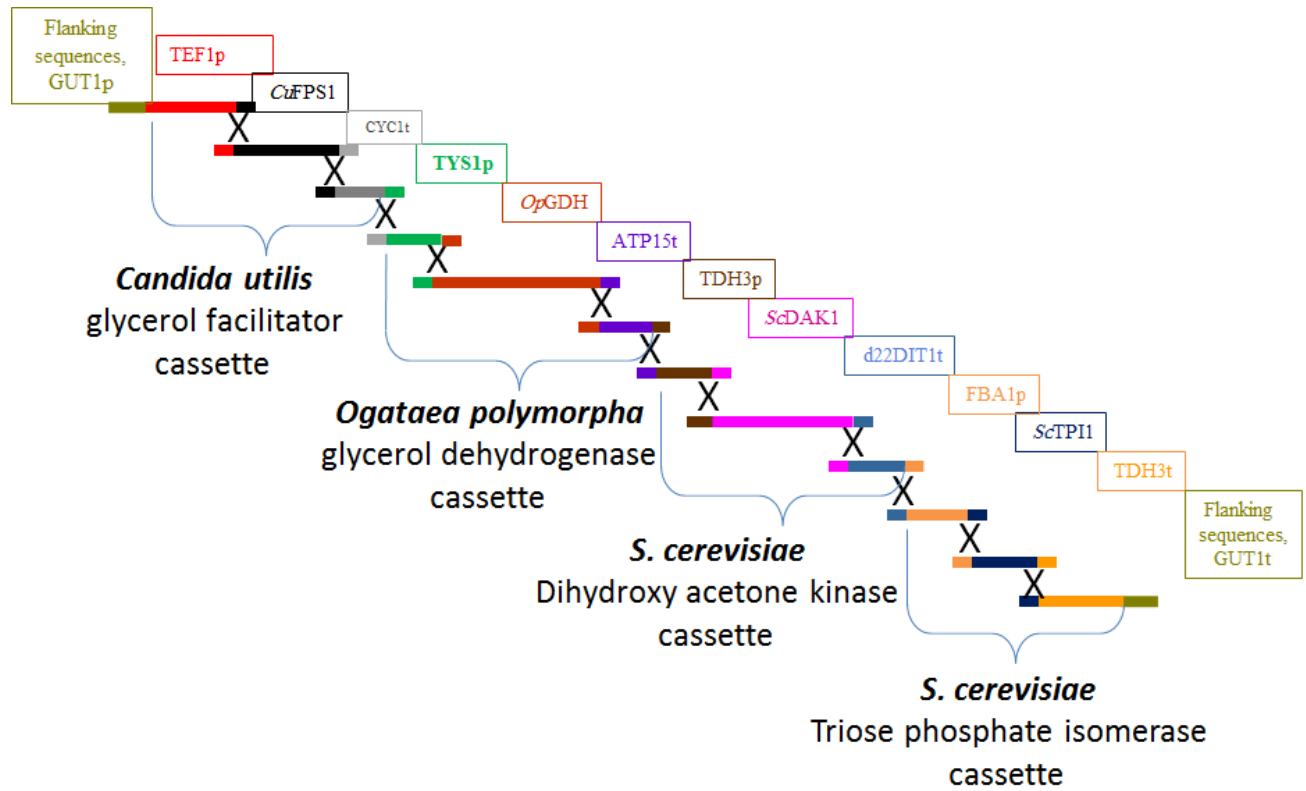

786

787 Fig. S2: Depicted module M1 for replacing GUT1 gene by homologous recombination using CRISPR system.

788

789

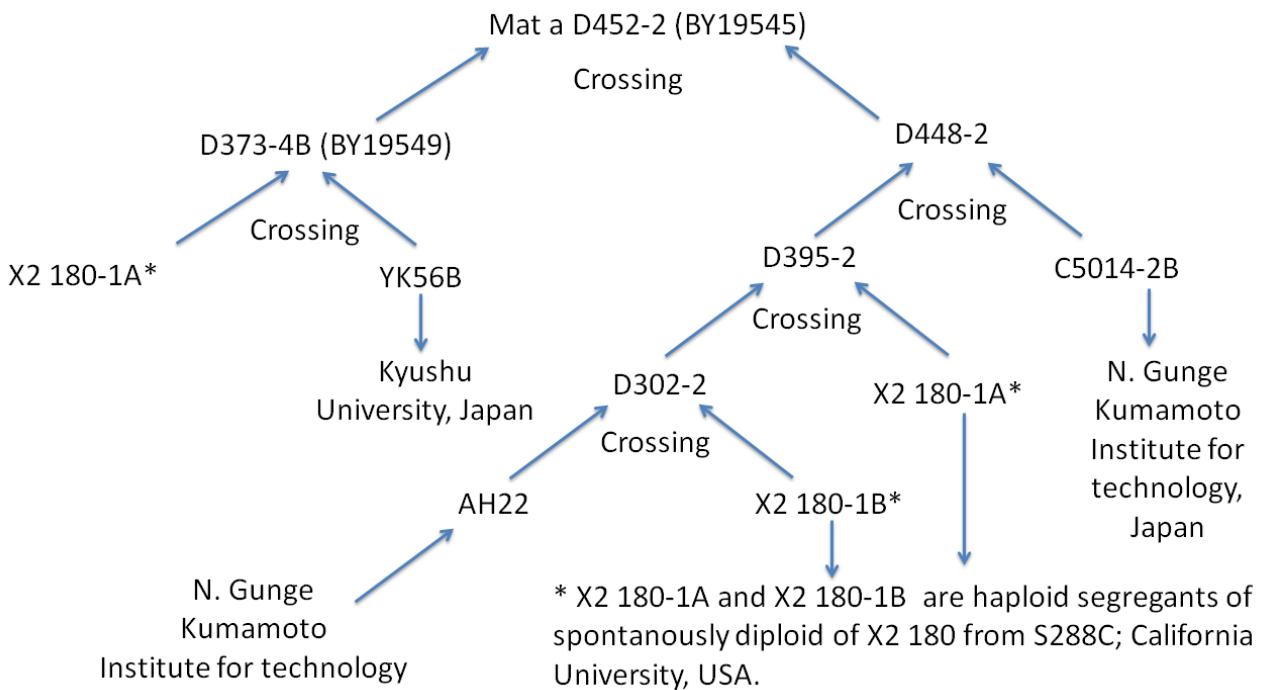

790

791 Fig. S3: Ancestral strain with its further original<sup>37-39</sup>.

792

793 Table S1 Primers used during this study.

|                                                                   |                                                           |
|-------------------------------------------------------------------|-----------------------------------------------------------|
| Section 1- primers for amplify the genes.                         |                                                           |
| GCY1 F                                                            | atgatggaattcatgcctgctactttacatg                           |
| GCY1 R                                                            | catcatggaaccttacttgaatacttcgaaagg                         |
| DAK1 F                                                            | atgatggaattcatgctccgctaatacgtttg                          |
| DAK 1 R                                                           | catcataagcctttacaagcgccttgaacc                            |
| DAK2 F                                                            | atgatggaattcatgtctcacaacaattcaaatc                        |
| DAK 2 R                                                           | catcatggaaccttagtaccagcagctgtaac                          |
| TPI1 F                                                            | atgatggaattcatggctagaactttctttg                           |
| TPI1 R                                                            | catcatgaattcttagttctagagttgatgatac                        |
| STL1 F                                                            | atgatggaattcatgaaggatttaaattatcg                          |
| STL1 R                                                            | catcataagcctttcaacctcaaaatttgc                            |
| GUT1 F                                                            | atgatggaattcatgttccctctctctcc                             |
| GUT1 R                                                            | catcatgaattcttattggaagtttctagaacc                         |
| GUT2 F                                                            | atgatgggtaccatgtttcggtaacgagaag                           |
| GUT2 R                                                            | catcatgaattcttagacaccaaacgtcttg                           |
| Δ XhoI site DAK2 F                                                | taaaaccatacgttgccttgggaagatgctgcttggatcg                  |
| Δ XhoI site DAK2 R                                                | cgataccaagagcagcatctccaagcgcaacgtatggtttta                |
| Del SalI-1 site GUT2 F                                            | caactccaagatcaagtggattttcaatcaaatcgccg                    |
| Del SalI-1 site GUT2 R                                            | cggcgatttgattgaaaatccacttgatcttggagttg                    |
| Del SalI-2 site GUT2 F                                            | atggctgaggaaacagtgataaagttgcgaagttgg                      |
| Del SalI-2 site GUT2 R                                            | ccaacttcgacaactttatccactgtttcctcagccat                    |
| Section 2- primers for sequencing the genes                       |                                                           |
| GCY1 Seq 400                                                      | aggatggttctcgtgcagtggatatacc                              |
| DAK1 Seq 400                                                      | atgttcagttggcagagaaaagggtgg                               |
| DAK1 Seq 907                                                      | ttgctggcacattgatcacctcttc                                 |
| DAK1 Seq 1670F                                                    | gtatgtcggcgattcatctc                                      |
| DAK2 Seq 401                                                      | ggttgcctgtaggagatgatgtctctg                               |
| DAK2 Seq 895                                                      | tgcccaagagaacgattactggagcattc                             |
| TPI1 Seq 401                                                      | gaaggccggttaagactttggatgtg                                |
| STL1 Seq 401                                                      | aggccagtttatcatcggaaagatcgtc                              |
| STL1 Seq 867                                                      | cagagggctttgattgcagcttcaacgc                              |
| GUT1 Seq 403                                                      | tggacttgactccataacgaacc                                   |
| GUT1 Seq 900                                                      | gcgttcgttctgacgtaaccaacgcttc                              |
| GUT2 Seq 403                                                      | tcacgaggcactcaacgagcgtaaac                                |
| GUT2 Seq 907                                                      | actccccgtaaacgacaactccaagatc                              |
| CjFPS 928f Seq                                                    | ttcggctacgacatcagaaa                                      |
| Opgdh 533R Seq                                                    | ttcaacagcatgccaggc                                        |
| Opgdh 495F Seq                                                    | attcccagcatatcgga                                         |
| Section 3- primers of construct pPGK-HIS3 plasmid                 |                                                           |
| HIS3 F                                                            | atgacagagcagaaagccctagtaaag                               |
| For HIS3 tail-pPGK post marker                                    | cctccaccaagggttcttatgtagaaaactgtattataagtaaatgcatgtatac   |
| Rev HIS3 tail-pPGK post Marker                                    | gtatacatgcatttactataatacagttttctacataagaacacotttgggtggagg |
| Rev. pPGK pre-marker                                              | gatttatcttctgttctcctgcagg                                 |
| Section 4- primers for construct URA3:TDH3-d22DIT1t plasmids with |                                                           |

|                                                                                                         |                                                                                |
|---------------------------------------------------------------------------------------------------------|--------------------------------------------------------------------------------|
| partial flanking sequences to GPD1p&t.                                                                  |                                                                                |
| XhoI- GPD1p flanking sequences-SmaI-SacI TDH3 For                                                       | aaactcagagtgtatattgtacacccccccctccacaacacaaatattgataatataaagcccgaggctcagttcagt |
| NotI-TDH3p Rev                                                                                          | tcatcggccgctttgtttgttatgtgtg                                                   |
| NotI OpGDH For                                                                                          | ttcggccgcatgaaaggttactttatt                                                    |
| BamHI OpGDH Rev                                                                                         | aaagatccttaggacacctcgttcggag                                                   |
| BamHI-d22DIT1t For                                                                                      | aaataaggatcctaaagtaagagcgctaca                                                 |
| NotI-NoxE L.lactis F                                                                                    | caaagcggccgcatgaaatcgtagtat                                                    |
| BamHI-NoxE L.lactis R                                                                                   | actttagatccttattttgcatttaaagc                                                  |
| NotI-BamHI- d22DIT1t FOR                                                                                | ttttcggccgcatcctaaagtaagag                                                     |
| XhoI-d22DIT1t rev                                                                                       | aaaactcaggatgaaagaagcaaat                                                      |
| SalI- GPD1t flanking sequences SacII-Rev                                                                | ttctcagcaaaaaagtggggaaagtatgatattgtatctttccaataaatcccggggatgaaagaagcaata       |
| Section 4.1- Primes for preparing homologous repairing cassettes                                        |                                                                                |
| Extend GPD1p flanking sequences For                                                                     | caagaacaattgtatattgtacaccccc                                                   |
| Extend GPD1t flanking sequences Rev                                                                     | tagaagagcctcgaaaaagtggggaaa                                                    |
| Section 4.2- Primes for preparing multiplex pCAS-gRNA-GPD1 plasmids                                     |                                                                                |
| pCAS-gRNA target 148-GPD1 F                                                                             | ctgggtactactattccaagttagagctagaaatagc                                          |
| pCAS Rev                                                                                                | tttttctgcagcgaggagcc                                                           |
| pCAS-gRNA target 148-GPD1 R                                                                             | tggcaatagtagtaccccaagaagtcattgccaccg                                           |
| pCAS For                                                                                                | cggaataggaactcaaacg                                                            |
| pCAS-gRNA target 1158-GPD1 F                                                                            | cacgaatggtggaacatggttttagagctagaaatagc                                         |
| pCAS-gRNA target 1158-GPD1 R                                                                            | catgtttcaaccattcgtgaaagtcattgccaccg                                            |
| Section 4.3- Primes for confirming multiplex pCAS-gRNA-GPD1 system                                      |                                                                                |
| GPD1 p integration check                                                                                | agactgtgtcctccactgt                                                            |
| NotI-TDH3p Rev                                                                                          | tcatcggccgctttgtttgttatgtgtg                                                   |
| BamHI-d22DIT1t For                                                                                      | aaataaggatcctaaagtaagagcgctaca                                                 |
| plus 1000 GPD1 Rev integration check                                                                    | ccttaacaagaacaatgcatgacattgga                                                  |
| GPD1 For                                                                                                | atgtctgctgctgatag                                                              |
| GPD1 Rev                                                                                                | ctaattctcatgtagactaattctca                                                     |
| Section 5- primers for construct URA3:TDH3-d22DIT1t plasmid with partial flanking sequences to GPD2p&t. |                                                                                |
| Minus379 SalI-GPD2p flanking sequences-SacI-PGKp For                                                    | aaagtcagcagtggtctgcccattgtatattaogcttttgogcgaggtcccggaagatgccgattggcgogaa      |
| NotI-PGKp REV                                                                                           | ggaaagcggccgcatctttggtttata                                                    |
| NotI -RPL41t FOR                                                                                        | ttttcggccgcgattgagagcaaatcg                                                    |
| plus310 SacI-GPD2t flanking sequences-XhoI- RPL41t Rev                                                  | ttgagctcttatctcagtggtggcccatgtggagaattactgcagtgaaaaagctcgagccgaaatctttcaagca   |
| Section 5.1- Primes for preparing multiplex pCAS-gRNA-GPD2 plasmids                                     |                                                                                |
| pCAS-gRNA target 279 GPD2 F                                                                             | gattggtctgtaactgggttttagagctagaaatag                                           |
| pCAS-gRNA target 279 GPD2 R                                                                             | agttaccagaaccaatcaaaagtccattcgcacc                                             |
| pCAS For                                                                                                | cggaataggaactcaaacg                                                            |
| pCAS Rev                                                                                                | tttttctgcagcgaggagcc                                                           |
| Section 5.2- Primes for confirming multiplex pCAS-gRNA-GPD2 system                                      |                                                                                |
| NotI -RPL41t FOR                                                                                        | ttttcggccgcgattgagagcaaatcg                                                    |
| plus557 GPD2 Rev                                                                                        | gccgctacgcagtcacatctgatcca                                                     |

|                                                                       |                                                                                                                                                |
|-----------------------------------------------------------------------|------------------------------------------------------------------------------------------------------------------------------------------------|
| Section 6- primers for construct pAUR101:PGKp-CuFPS1-RPL41Bt plasmid. |                                                                                                                                                |
| SmaI-PGKp                                                             | aaaaa <b>cccgaggagcttggaaagatgcc</b>                                                                                                           |
| NotI-PGKp REV                                                         | <b>ggaaagcggccgcgatctttggtttata</b>                                                                                                            |
| NotI CuFPS For                                                        | <b>ttcgccgcgatgacaggagaattactg</b>                                                                                                             |
| NotI CuFPS Rev                                                        | <b>aagcggccgcgcttaagcgtcaagacgaccg</b>                                                                                                         |
| NotI -RPL41t FOR                                                      | <b>ttttcgccgcggttgagagcaaatcg</b>                                                                                                              |
| plus310 SacI-GPD2t flanking sequences-XhoI- RPL41t Rev                | <b>ttgagctcttatctcagtgctggcccatgtggagaattactgcagtgaaaagctcagccgaaaactcttcaagca</b>                                                             |
| Section 7- Primers for Gibson assembly module M1- flanking GUT1p&t    |                                                                                                                                                |
| F1 FOR primer ( <b>GUT1 -TEF1 p</b> )                                 | 5'-ccatataaaatataccatgtggttgagttgtggccggaactatacaaatagttat <b>atagcttcaaaatgtttactcc</b> -3'                                                   |
| F1 REV primer ( <b>CuFPS-TEF1p</b> )                                  | 5'- <b>gtaattcctctgcat</b> ttt <b>gtaattaaaacttagattagattgctatgctttcttc</b> -3'                                                                |
| F2 FOR primer ( <b>TEF1p - CuPS</b> )                                 | 5'- <b>ctaagtttaattacaaaatgacaggagaattactgctagtggtgaag</b> -3'                                                                                 |
| F2 REV primer (CYC1t - <b>CuFPS</b> )                                 | 5'- ggaaaagggcctgttcaagcgt <b>caagacgaccgtggctagcctccg</b> -3'                                                                                 |
| F3 FOR primer ( <b>CuFPS-CYC1t</b> )                                  | 5'- <b>cgtcttgaccctg</b> aacagccctttctttgctgatcatg -3'                                                                                         |
| F3 REV primer ( <b>TYS1p-CYC1t</b> )                                  | 5'- <b>gtaagcgc</b> caag <b>gacaaftaaagccttcgagcg</b> tcccaaac-3'                                                                              |
| F4 FOR primer (CYC1t- <b>TYS1p</b> )                                  | 5'- <b>cgctcgaagc</b> tttaatt <b>tccttcgcttactcgaataggcctccctagc</b> -3'                                                                       |
| F4 REV primer ( <b>OpGDH-TYS1p</b> )                                  | 5'- <b>cctttcatg</b> ttat <b>gcaatagatgctgggtatggaagc</b> -3'                                                                                  |
| F5 FOR- <b>TYS1p- linked-OpGDH gene synthetically</b>                 | 5'-catactctaattgacgataac <b>atgaaagtttacttta</b>                                                                                               |
| F6 FOR- <b>OpGDH gene-link ATP15t synthetically</b>                   | <b>5-ctcogaacgaggtgtcctag</b> tttaacgcttctctgggaactgcagctc -3'                                                                                 |
| F6 REV primer ( <b>ATP15t-TDH3p</b> )                                 | 5'- <b>gataaactcgaactgagagc</b> tgaa <b>gcagagaagttctggaac</b> -3'                                                                             |
| F7 FOR primer ( <b>ATP15t-TDH3p</b> )                                 | 5'- <b>cttctc</b> cttcagcctcag <b>ttcagttatcattatcaactg</b> ccatttc-3'                                                                         |
| F7 REV primer ( <b>DAK1-TDH3p</b> )                                   | 5'- <b>cgatttagc</b> gacatt <b>tttctttttatgctgtttattc</b> gaaac-3'                                                                             |
| F8 FOR primer ( <b>TDH3p-DAK1</b> )                                   | 5' - <b>cacacataa</b> caaa <b>caaaaatg</b> tc <b>ccgcta</b> aat <b>cg</b> ttt <b>gaagtcacagatcc</b> -3'                                        |
| F8 REV Primer ( <b>d22-DITt - DAK1</b> )                              | 5'- <b>gcgctcttacttt</b> atacaagc <b>ctttg</b> aaccccttcaaaaactc-3'                                                                            |
| F9 FOR <b>DAK1-linked-d22DITt synthetically</b>                       | 5'- <b>ggggttcaaagc</b> ctt <b>gtaa</b> aa <b>gtaagagcgc</b>                                                                                   |
| F10 FOR <b>FBA1p-linked-d22DITt synthetically</b>                     | 5'- <b>gcctttctttcat</b> ataacaactgacagtac                                                                                                     |
| F10 REV Primer ( <b>TPI1-FBA1p</b> )                                  | 5'- <b>caagaaaagttctagccatt</b> tt <b>gatatgattactggttatg</b> -3'                                                                              |
| F11 FOR primer ( <b>FBA1p-TPI1</b> )                                  | 5'- <b>ccaagta</b> atata <b>ttcaaaatg</b> ctgacttctttgctggtgtaac-3'                                                                            |
| F11 REV Primer ( <b>TDH3t-TPI1</b> )                                  | 5'- <b>gattaaagta</b> aatt <b>cacttagttctagagttgat</b> atataac-3'                                                                              |
| F12 FOR primer ( <b>TPI1-TDH3t</b> )                                  | 5'-caactctagaaactaag <b>tg</b> aattactt <b>taaatctg</b> catttaataaat <b>tttc</b> -3'                                                           |
| F12 REV Primer ( <b>GUT1- TDH3t</b> )                                 | 5'- <b>tggagagg</b> aatata <b>aaaatgatg</b> aaattacatt <b>g</b> taata <b>gaaattat</b> gt <b>g</b> aa <b>ggg</b> aaag <b>atagagct</b> atacag-3' |
| F6 extend Rev2                                                        | 5'- tattgataatgataaactcgaactgagagg                                                                                                             |
| F7 extend For2                                                        | 5'- cagaaactctctgcttcagcct                                                                                                                     |
| SacI- GUT1p M1 For2                                                   | 5'-agc <b>gagctc</b> gaaccataaaaatatacca                                                                                                       |
| SmaI-Gut1t M1 Rev2                                                    | 5'-aacc <b>cggtg</b> gagaggaatataaaattat                                                                                                       |
| Section 7.1- Primes for preparing multiplex pCAS-gRNA-GUT1 plasmids   |                                                                                                                                                |
| pCAS-gRNA target 628 GUT1 F                                           | 5'- <b>attctgtg</b> tc <b>cccgccgac</b> gttttagagctgaaatagc                                                                                    |
| pCAS-gRNA target 628 GUT1 R                                           | 5'- <b>gtg</b> cg <b>ggggaccag</b> aat <b>aa</b> g <b>tccattc</b> gccaccg                                                                      |
| Section 7.2- Primes for confirming multiplex pCAS-gRNA-GUT1 system    |                                                                                                                                                |
| GUT1p integ. Check F                                                  | 5'-cggataaggtgtaataaaatgtg                                                                                                                     |
| F1 REV primer ( <b>CuFPS-TEF1p</b> )                                  | 5'- <b>gtaattcctctgcat</b> ttt <b>gtaattaaaacttagattagattgctatgctttcttc</b> -3'                                                                |

|                                 |                                                              |
|---------------------------------|--------------------------------------------------------------|
| GUT1t integ. Check R            | 5'-tcttcataactaggttacagtc                                    |
| TPI1 Seq 401                    | 5'-gaaggccggaagacttggatgtg                                   |
|                                 |                                                              |
| <u>Barcode</u>                  | taagatgtcc aaacccttgggaaacccttggg aaacccttgggaaac gcagcgtacg |
| Upstream barcode flanking FOR   | caaacggtctcccaccttacaaggtaatatgcatgggtatagcaaacatgtaagatgtcc |
| Downstream barcode flanking REV | tttgccattgtctctaacgatttggatcgtctctggtgtcgttccaaccgtacgctgc   |
|                                 |                                                              |

794

795

796 Table S2. Full sequences of the integrated cassettes and module M1 with flanking sequences

1- Cassette1; partial end of GPD1promoter-TDH3p-d22DIT1t-partial front side of GPD1terminator

**AActcgag**TGTATATTGTACACCCCCCCCCTCCACAAACACAAATATTGATAATATAAAG**cc**  
**cgggagctc**AGTTCGAGT**TTATCATTATCAATACTGCCATTTCAAAGAATACGTAAATAATT**  
AATAGTAGTGATTTTCCTAACTTTATTTAGTCAAAAAATTAGCCTTTTAATTCTGCTGTA  
ACCCGTACATGCCAAAATAGGGGGCGGGTTACACAGAATATATAACATCGTAGGTGT  
CTGGGTGAACAGTTTATTCCTGGCATCCACTAAATATAATGGAGCCCGCTTTTTAAGCTG  
GCATCCAGAAAAAAAAGAATCCCAGCACCAAAATATTGTTTTCTTCACCAACCATCAG  
TTCATAGGTCCATTCTCTTAGCGCAACTACAGAGAACAGGGGCACAAACAGGCAAAAA  
ACGGGCACAACCTCAATGGAGTGATGCAACCTGCCTGGAGTAAATGATGACACAAGGC  
AATTGACCCACGCATGTATCTATCTCATTTTCTTACACCTTCTATTACCTTCTGCTCTCTC  
TGATTTGGAAAAAGCTGAAAAAAAAGGTTGAAACCAGTTCCTGAAATTATTCCCCTAC  
TTGACTAATAAGTATATAAAGACGGTAGGTATTGATTGTAATTCTGTAATCTATTTCTT  
AACTTCTTAAATTCTACTTTTATAGTTAGTCTTTTTTTTAGTTTTAAACACCAAGAACT  
TAGTTTCGAATAAACACACATAAACAAA**CAAAcgggccggatccTAAAGTAAGAGCGCTAC**  
**A**TTGGTCTACCTTTTTCTTTACTTAAACATTAGTTAGTTCGTTTTCTTTTTCTTTTTTAT  
GTTCCCCCCCCAAAGTTCTGATTTTATAATTTTATTTACACAATTCCATTTAACAGA  
GGGGGAATAGATTCTTTAGCTTAGAAAATTAGTGATCAATATATATTGCTTTCTTTTC  
AT**Cccgcg**ATTTATTGGAGAAAGATAACATATCATACTTTCCCCACTTTTTTC**gtcgac**AA

2- Cassette 2; *OpGDH* cassette, TDH3p- *OpGDH*-d22DIT1t.

**ctcgag**TGTATATTGTACACCCCCCCCCTCCACAAACACAAATATTGATAATATAAAG**ccccgg**  
**gagctc**AGTTCGAGTTTATCATTATCAATACTGCCATTTCAAAGAATACGTAAATAATTAAT  
AGTAGTGATTTTCCTAACTTTATTTAGTCAAAAAATTAGCCTTTTAATTCTGCTGTAACC  
CGTACATGCCAAAATAGGGGGCGGGTTACACAGAATATATAACATCGTAGGTGTCTG  
GGTGAACAGTTTATTCCTGGCATCCACTAAATATAATGGAGCCCGCTTTTTAAGCTGGC  
ATCCAGAAAAAAAAGAATCCCAGCACCAAAATATTGTTTTCTTCACCAACCATCAGTT  
CATAGGTCCATTCTCTTAGCGCAACTACAGAGAACAGGGGCACAAACAGGCAAAAAAC  
GGGCACAACCTCAATGGAGTGATGCAACCTGCCTGGAGTAAATGATGACACAAGGCAA  
TTGACCCACGCATGTATCTATCTCATTTTCTTACACCTTCTATTACCTTCTGCTCTCTCTG  
ATTTGGAAAAAGCTGAAAAAAAAGGTTGAAACCAGTTCCTGAAATTATTCCCCTACTT  
GACTAATAAGTATATAAAGACGGTAGGTATTGATTGTAATTCTGTAATCTATTTCTTAA  
ACTTCTTAAATTCTACTTTTATAGTTAGTCTTTTTTTTAGTTTTAAACACCAAGAACTTA  
GTTTCGAATAAACACACATAAACAAA**CAAAcgggccgc**ATGAAAGGTTTACTTTATTACGG  
TACAAACGATATTCGCTACTCCGAAACGGTTCCTGAACCGGAGATCAAAAACCCCAAC  
GATGTCAAGATCAAAGTCAGCTACTGTGGAATCTGTGGCACAGACCTGAAAGAATTAC  
ATATTCTGGAGGCCCTGTTTTTTTCCCTAAACACGGCACCAAGGACAAGATCTCGGGAT  
ACGAGCTTCCCTCTGTCTGCTGACATGAATTCAGCGGAACAGTGATTGAGGTTGGCTCT  
GGTGTCAACAGTGTGAAACCTGGTGACAGGGTCGCAGTTGAAGCTACGTCCCATTGCTC  
CGACAGATCGCGCTACAAAGACACGGTCGCCAGGACCTCGGGCTCTGTATGGCCTGC  
AAGAGCGGATCTCCAAACTGCTGTGTGTCGCTGAGCTTCTGCGGTTTGGGTGGTGCCAG  
CGGCGGTTTTGCCGAGTACGTCGTTTACGGTGAGGACCACATGGTCAAGCTTCCAGACT  
CGATTCCCGACGATATCGGAGCATTGGTTGAGCCTATTGCTGTTGCCTGGCATGCTGTTG



AACGCGCTAGATTCCAGCCTGGCCAGACGGCCCTGGTTCTTGGAGGAGGTCCTATCGGC  
CTTGCCACCATTCTTGCTCTGCAAGGCCACCGTGCCGGCAAATTGTGTGTTCCGAGCC  
GGCCTTGATTAGAAGACAGTTTGCAAAGGAACTGGGCGCTGAAGTGTTTGATCCTTCTA  
CATGTGATGACGCAAATGCCGTTCTCAAGGCTATGGTGCCGAAAACGAAGGATTCCAC  
GCAGCCTTCGACTGCTCTGGAATTCCTCAGACATTCACCACCTCTATTGTGCGCCACAGGC  
CCTTCGGGAATCGCCGTCAACGTGGCCATTTGGGGAGACCACCAATTGGATTCATGCC  
AATGTCTCTGACTTACCAAGAGAAATACGCTACCGGCTCCATGTGCTACACCGTCAAGG  
ACTTCCAGGAAGTTGTCGGGGCCTTGAAGATGGTCTCATATCTTTGGACAAGGCGCGC  
AAGATGATTACAGGCAAAGTCCACCTAAGGGACGGAGTCGAGAAGGGCTTTAGACAGC  
TCATCGAGCACAAGGAAACCAATGTCAAGATCCTGGTGACTCCGAACGAGGTGTCCTA  
AggatccTAAAGTAAGAGCGCTACATTGGTCTACCTTTTTCTTTACTTAAACATTAGTTAG  
TTCGTTTTCTTTTTCTTTTTTATGTTTCCCCCCAAAGTTCTGATTTTATAATATTTTATT  
TCACACAATTCATTTAACAGAGGGGGAATAGATTCTTTAGCTTAGAAAATTAGTGATC  
AATATATATTTGCCTTTCTTTTCATCccgaggATTTATTGGAGAAAGATAACATATCATACT  
TTCCCCACTTTTTTCgtcgac

3- Cassette 3; NoxE *L.lacis* cassette, partial end of GPD1 promoter-TDH3p-*LN*NoxE-d22DIT1t-  
partial front side of GPD1 terminator

ctcgagTGTATATTGTACACCCCCCTCCACAAACACAAATATTGATAATATAAAGcccg  
gagctcAGTTCGAGTTTATCATTATCAATACTGCCATTTCAAAGAATACGTAAATAATTAAT  
AGTAGTGATTTTCTAACTTTATTTAGTCAAAAATTAGCCTTTTAATTCTGCTGTAACC  
CGTACATGCCAAAATAGGGGGCGGGTTACACAGAATATATAACATCGTAGGTGTCTG  
GGTGAACAGTTTATTCCTGGCATCCACTAAATATAATGGAGCCCGCTTTTTAAGCTGGC  
ATCCAGAAAAAAGAATCCCAGCACAAAATATTGTTTTCTTACCAACCATCAGTT  
CATAGGTCCATTCTCTTAGCGCAACTACAGAGAACAGGGGCACAAACAGGCAAAAAC  
GGGCACAACCTCAATGGAGTGATGCAACCTGCCTGGAGTAAATGATGACACAAGGCAA  
TTGACCCACGCATGTATCTATCTCATTTTCTTACACCTTCTATTACCTTCTGCTCTCTG  
ATTTGGAAAAAGCTGAAAAAAGGTTGAAACCAGTTCCCTGAAATTATTCCCCTACTT  
GACTAATAAGTATATAAAGACGGTAGGTATTGATTGTAATTCTGTAAATCTATTTCTTAA  
ACTTCTTAAATTCTACTTTTATAGTTAGTCTTTTTTTTAGTTTTAAAACACCAAGAACTTA  
GTTTCGAATAAACACACATAAACAAAAGcgggcgcATGAAAATCGTAGTTATCGGTAC  
GAACCACGCAGGCATTGCTACAGCAAATACATTAATTGATCGATATCCAGGCCATGAGA  
TTGTTATGATTGACCGTAACAGTAATATGAGTTACTTGGGGTGTGGGACAGCTATTTGG  
GTCGGAAGACAAATTGAAAACAGATGAGCTGTTTTATGCCAAAGCAGAAGATTTTG  
AAAAAAGGGAGTAAAGATATTAACAGAAACAGAAGTTTCAGAAATTGACTTTACTAA  
TAAAATGATTTATGCCAAGTCAAAAACCTGGAGAAAAGATTACAGAAAGTTATGATAAA  
CTCGTTCTGGCAACAGGTTTACGTCCAATTATTCCTAACTTGCCAGGAAAAGATCTTAA  
AGGCATTCATTTTTTAAACTTTTTCAAGAAGGGCAAGCCATTGACGAAGAGTTTGCTA  
AGAATGATGTGAAACGGATTGCTGTGATTGGTGTCTGGTTATATTGGGACAGAAATTGCT  
GAAGCTGCCAAACGTCGTGGAAAAGAAGTCTACTTTTTGATGCAGAAAGTACTTCACT  
TGCTTCATATTATGATGAAGAGTTTGCTAAAGGGATGGATGAAAATCTTGCCCAACATG  
GAATTGAACTCCATTTTGGGGAATTAGCTCAAGAGTTTAAAGGCAAATGAAAAGGTCAT  
GTATCACAGATTGTAACATAATAATCAACTTATGATGTTGACCTCGTTATTAATTGTATT

GGCTTTACAGCCAATAGTGCATTGGCTGGTGAACATTTAGAAACCTTTAAAAATGGAGC  
AATCAAAGTGGATAAACATCAACAAAGTAGTGACCCAGATGTTTCTGCTGTAGGAGAT  
GTTGCCACAATCTATTCTAATGCTTTACAAGACTTCACCTACATTGCCCTTGCCTCAAAC  
GCTGTTGCTCAGGGATTGTTGCTGGTCATAATATTGGAGGAAAATCAATAGAGTCTGT  
TGGTGTACAAGGTTCTAATGGAATCTCTATTTTTGGTTACAATATGACTTCTACGGGCTT  
GTCGGTTAAAGCTGCGAAAAAATCGGCCTAGAAGTTTCATTTAGTGATTTTGAAGATA  
AGCAAAAAGCATGGTTCCTTCATGAAAATAATGATAGTGTGAAAATTCGTATCGTTTAT  
GAAACAAAAAATCGCAGAATTATTGGTGCTCAACTTGCTAGCAAGAGTGAAATAATTG  
CAGGAAATATTAATATGTTTAGTTAGCTATTCAAGAAAAGAAAACGATTGATGAATTA  
GCCTTACTTGATTTATTCTTCTTACCACACTTCAATAGTCCATATAATTACATGACTGTTG  
CAGCTTTAAATGCAAAATAA **ggatcc**TAAAGTAAGAGCGCTACATTGGTCTACCTTTTTCTT  
TTACTTAAACATTAGTTAGTTCGTTTTCTTTTTCTTTTTTATGTTTCCCCCCAAAGTTCT  
GATTTTATAATATTTTATTTACACAATTCCATTTAACAGAGGGGGAATAGATTCTTTAG  
CTTAGAAAATTAGTGATCAATATATTTGCCTTTCTTTTCATC **ccg**cg **ATTTATTGGAGA**  
**AAGATAACATATCATACTTTCCCCACTTTTTTC**g **gtcgac**

4- Cassette 4; NoxE L.lacis cassette, partial end of GPD2promoter-TDH3p-LINoxE-d22DIT1t-  
partial front side of GPD2 terminator

**gtCGACGATGGCTCTGCCATTGTTATATTACGCTTTTGC**GGCGAGGGT**GCCG**cg **TCAGTTC**  
**GAGTTTATCATTATC**AATACTGCCATTTCAAAGAATACGTAAATAATTAATAGTAGTGA  
TTTTCTAACTTTATTTAGTCAAAAATTAGCCTTTTAATTCTGCTGTAACCCGTACATG  
CCCAAAATAGGGGGCGGGTTACACAGAATATATAACATCGTAGGTGTCTGGGTGAACA  
GTTTATTCCTGGCATCCACTAAATATAATGGAGCCCGCTTTTTAAGCTGGCATCCAGAA  
AAAAAAGAATCCAGCACCAAAATATTGTTTTCTTCACCAACCATCAGTTCATAGGTC  
CATTCTCTTAGCGCAACTACAGAGAACAGGGGCACAAACAGGCAAAAAACGGGCACAA  
CCTCAATGGAGTGATGCAACCTGCCTGGAGTAAATGATGACACAAGGCAATTGACCCA  
CGCATGTATCTATCTCATTTTTCTTACACCTTCTATTACCTTCTGCTCTCTCTGATTTGGAA  
AAAGCTGAAAAAAAGGTTGAAACCAGTTCCTGAAATTATCCCCTACTTGACTAATA  
AGTATATAAAGACGGTAGGTATTGATTGTAATTCTGTAAATCTATTTCTTAACTTCTTA  
AATTCTACTTTTATAGTTAGTCTTTTTTTTTAGTTTTAAAACACCAAGAAGTATTGTTTCGAA  
TAAACACACATAAAACAAACAAAg **cg**g **cg**cg **ATGAAAATCGTAGTTATCGGTACGAACCACG**  
**CAGGCATTGCTACAGCAAATACATTAATTGATCGATATCCAGGCCATGAGATTGTTATG**  
**ATTGACCGTAACAGTAATATGAGTTACTTGGGGTGTGGGACAGCTATTGGGTGCGGAAG**  
**ACAAATTGAAAACCAGATGAGCTGTTTTATGCCAAAGCAGAAGATTTTGA**AAAAAAG  
GGAGTAAAGATATTAACAGAAACAGAAGTTTCAGAAATTGACTTTACTAATAAAATGA  
TTTATGCCAAGTCAAAAACCTGGAGAAAAGATTACAGAAAGTTATGATAAACTCGTTCTG  
GCAACAGGTTACGTCCAATTATTCCTAACTTGCCAGGAAAAGATCTTAAAGGCATTCA  
TTTTTTAAAACTTTTTCAAGAAGGGCAAGCCATTGACGAAGAGTTTGCTAAGAATGATG  
TGAAACGGATTGCTGTGATTGGTGTGTTATATTGGGACAGAAATTGCTGAAGCTGCC  
AAACGTCGTGGAAAAGAAGTCCTACTTTTTGATGCAGAAAGTACTTCACTTGCTTCATA  
TTATGATGAAGAGTTTGCTAAAGGGATGGATGAAAATCTTGCCCAACATGGAATTGAAC  
TCCATTTTGGGGAATTAGCTCAAGAGTTTAAAGGCAAATGAAAAGGTCATGTATCACAG  
ATTGTAACATAAATCAACTTATGATGTTGACCTCGTTATTAATTGTATTGGCTTTACA  
GCCAATAGTGCATTGGCTGGTGAACATTTAGAAACCTTTAAAAATGGAGCAATCAAAGT  
GGATAAACATCAACAAAGTAGTGACCCAGATGTTTCTGCTGTAGGAGATGTTGCCCAA

TCTATTCTAATGCTTTACAAGACTTCACCTACATTGCCCTTGCCTCAAACGCTGTTTCGCT  
CAGGGATTGTTGCTGGTCATAATATTGGAGGAAAATCAATAGAGTCTGTTGGTGTACAA  
GGTTCTAATGGAATCTCTATTTTTGGTTACAATATGACTTCTACGGGCTTGTCCGGTTAAA  
GCTGCGAAAAAATCGGCCTAGAAGTTTCATTTAGTGATTTTGAAGATAAGCAAAAAGC  
ATGGTTCCTTCATGAAAATAATGATAGTGTGAAAATTCGTATCGTTTATGAAACAAAAA  
ATCGCAGAATTATTGGTGTCTCAACTTGCTAGCAAGAGTGAAATAATTGCAGGAAATATT  
AATATGTTTATGTTTAGCTATTCAAGAAAAGAAAACGATTGATGAATTAGCCTTACTTGA  
TTTATTCTTCTTACCACACTTCAATAGTCCATATAATTACATGACTGTTGCAGCTTTAAA  
TGCAAATAA **ggatcc**TAAAGTAAGAGCGCTACATTGGTCTACCTTTTTCTTTTACTTAAAC  
ATTAGTTAGTTCGTTTTCTTTTTCTTTTTTATGTTTCCCCCCAAAGTTCTGATTTTATAA  
TATTTTATTTACACAATTCCATTTAACAGAGGGGGAATAGATTCTTTAGCTTAGAAAAT  
TAGTGATCAATATATATTTGCCTTTCTTTTCATC **ctCGAGCTTTTTCTACTGCAGTAATTCT**  
**CCACATGGGCCAGCCACTGAGATAAGAGCtc**

5- Cassette 5; Glycerol facilitator cassette, PGK promoter- *Candida utilis* glycerol facilitator (CuFPS) - RPL41B terminator.

**cccgggAAAGATGCCGATTTGGGCGCGAA**TCCTTTATTTGGCTTCACCCTCATACTATTAT  
CAGGGCCAGAAAAGGAAGTGTTCCCTCCTTCTTGAATTGATGTTACCCTCATAAAGC  
ACGTGGCCTCTTATCGAGAAAGAAATTACCGTCGCTCGTGATTTGTTTGCAAAAAGAAC  
AAAACGAAAAAACCCAGACACGCTCGACTTCTGTCTTCTATTGATTGCAGCTTCCA  
ATTTCTGTCACACAACAAGGTCCTAGCGACGGCTCACAGGTTTTGTAACAAGCAATCGAA  
GGTTCGGAATGGCGGGAAAGGGTTTAGTACCACATGCTATGATGCCACTGTGATCTC  
CAGAGCAAAGTTCGTTTCGATCGTACTGTTACTCTCTCTCTTTCAAACAGAATTGTCCGAA  
TCGTGTGACAACAACAGCCTGTTCTCACACACTCTTTTCTTCTAACCAAGGGGGTGGTTT  
AGTTTAGTAGAACCTCGTGAAACTTACATTTACATATATAAACTTGCATAAATTGGTC  
AATGCAAGAAATACATATTTGGTCTTTTCTAATTCGTAGTTTTTCAAGTTCTTAGATGCT  
TTCTTTTTCTTTTTTACAGATCATCAAGGAAGTAATTATCTACTTTTTACAACAAATAT  
**AAAACCAAAGATCGggggccgc**atgacaggagaattactgctagtgggaaggctgtagttctgatagtaactaactcta  
cagcagcgccttctctggtcttgagagaagagcaaacattactgaccacatctctgtgaacattactgctctgcaagattcagatatggattc  
agagagtactttgctgaattatcggtaccatgaccttctgtagtttgggtgacgggtgtgtgccagctactctgtccaaggatctgctgtaact  
atacaaccattgctttctggtggccactgcccgtttctggtactgctgttctgcccgtactctggtgctcattgaacctgctgttactcttcagc  
tactctttcagacagttcccatggagaaggtattgggtacatgttgcceaggtctggtgttacatggcgccttatcgtttacggtactat  
atccaatccatcaacaactactctggtgaaggccagagaatcggcgtggtgacaaatccaggtggaatctctgactttcccacaacttact  
gaacaccaagggtcaggttacatccgagctgtcaccactgcctttgagtttggtattttctccatgactgacctcacaatgcaccattgggtaa  
cttcttccattcggattatgtagcttgattatggattgggtaccttttgggtaccagaccggttatgcatcaactttgcaagagattcaccceaag  
attggctgctttgactgtcggtatggtaccgagatgttaccgctactaccactactctgggtgccaatgatcatccattcattggtgactgct  
ggtgctttcatctatgattcttcatctaccaaggcttgactgcccattgaaccagcaagttcgggtacgacatcagaagaagaagatccagg  
agtttgaattcaattggagaactacaagcttgacttcaaccggaggctagccacggctgctttagc **cttaagcgggcccgcGCGGATTG**  
**AGAGC**AAATCGTTAAGTTCAGGTCAAGTAAAAATTGATTTTCGAAAATAAATTCTCTTA  
TACAATCCTTTGATTGGACCGTCATCCTTTCGAATATAAGATTTTGTAAAGAATATTTTA  
GACAGAGATCTACTTTATATTTAATATCTAGATATTACATAAATTCCTCTCTAATAAAAT  
ATCATTAAATAAAATAAAAATGAAGCGATTTGATTTTGTGTTGTCAACTTAGTTTGGCGCT  
ATGCCCTTTGGGTAATGCTATTATTGAATCGAAGGGCTTTATTATATTACCCTTTAGCTT  
ATTCTGAGGTTTCTGTGGCGTGCAAAGTGATGAACCGGGCGGGTTTTAAGGATAAAATC  
AAAAAGTGAAAAAATGAACGGAAAATGGAATACCTGTGAAATGGAGAATGATAATGA

ATCTTTCTGTCGTGCTTGAAAGATTTTCGGCTGAGctc

6- Module M1; CuFPS1, OgGDH, ScDAK1, ScTPI1 cassettes with flanking sequences of GUT1 promoter and terminator

**CTCGA**ACCATATAAAATATACCATGTGGTTTGAGTTGTGGCCGGA**ACT**TATACAAATA  
**GTTATATAGCTTCAAAATGTTTCTACTCC**TTTTTTACTCTTCCAGATTTTCTCGG  
**ACTCCGCGCATCGCCGTACCACTTCAAAACACCCAAGCACAGCATACTAAATTT**  
**CCCCTCTTTCTTCTCTAGGGTGTGTTAATTACCCGTAATAAGGTTTGGAAA**  
**AGAAAAAGAGACCGCCTCGTTTCTTTTCTTCGTCGAAAAAGGCAATAAAAT**  
**TTTTATCACGTTTCTTTTCTTGAAAAATTTTTTTTTTGATTTTTTCTTTTCGAT**  
**GACCTCCATTGATATTTAAGTTAATAAACGGTCTTCAATTTCTCAAGTTTCAGT**  
**TTCATTTTTCTTGTCTATTACAACTTTTTTACTTCTTGCTCATTAGAAAAGAAA**  
**GCATAGCAATCTAATCTAAGTTTAAATTACAAA**atgacaggagaacttctgtagtggtgaagcgtga  
gttctgatatagattaactactacagcagcgccttctctggtcttgagagaagagcaaacattactgaccacatcttctgtaacattca  
ctgctctgcaaagattcagatatggattcagagacttctgctgaattatcgggtaccatgatccttctgtagtttggtgacgggtgtgtgccc  
gtactctgtccaagggatctgctgtaactatacaaccattgcctttctggtggccactgccgtttctggttactgctgtctgctggtgac  
tctggtgctcattgaacctgctgttactcttctcagctgctacttctcagacagttccatggagaaaggtattgggttacatgtttgccc  
aaggtctggtggttacatcggtgccccttctggttacggtacctatatacaacacactactctggtgaaggccagagaatcgccgctggtga  
caatccacaggtggaatctctgacttcccacaacctacttgaacaccaagggcaggttacatccgagctgtcaccactgccctttgc  
agtttggtatttctccatgactgatctcacaatgcaccattgggtaacttctccattcggattatgtagcttattatgattgggtacctctt  
tggttaccagaccggttatgccatcaacttgcagagattcaccacaagattggctgcttctgactgctggctatggtaccgagatgtcaccg  
cctactaccactactctgggtgccaatgatcatccattcattggctgactgctgctgcttctatctatgatttctcatctaccaagcgttgac  
tcgccattgaaccagcaaaggtcggctacgacatcagaagaagaagatccaggagttgaattcaaatggagaactacaagcttgact  
caaccggaggctagccacggctgctctgacgcttga**ACAGGCCCTTTTCC**TTTGTCGATATCATGTAAT  
TAGTTATGTCACGCTTACATTCACGCCCTCCTCCACATCCGCTCTAACC<sup>3</sup>GAAAAGG  
AAGGAGTTAGACAACCTGAAGTCTAGGTCCTATTTATTTTTTTTAATAGTTATGTTA  
GTATTAAGAACGTTATTTATATTTCAAATTTTTCTTTTTTTTCTGTACAAACGCGTGTA  
CGCATGTAACATTATACTGAAAACCTTGCTTGAGAAGGTTTTGGGA**CGCTCGAAGGC**  
**TTAATTTGTCCTTGCGCTTACTCGAATAGGCCTCCCTAGC**TATTCTTCAACCTTT**CG**  
**AACCATCCATACTTCTTACTATCATAATTTTTATTTTATCATGGAGGCGAGAAGGTCC**  
**TTATTCGAGCATCACTAAGAACGGA**ACTCGAACATTTACAAAGTAGAAAAATTTTAT  
GAAAATTAATTGTTCTTTCTT**CAGAATACAAATTAGTCATTGTCAAAAAGAGATTAG**  
**CATCCATAACCGCATACTCTAATTGACGATAAC**atgaaaggttactttattacggtacaaacgatattcgcta  
ctccgaaacggttctgaaccggagatcaaaaacccaacgatgcaagatcaaaagtcagctactgtggaatctgtggcacagacctgaaa  
gaattcacatattctggagccctgtttttccctaaacacggcaccgaagacaagatctcgggatacagacttctctctgctctgacatga  
attcagcggaacagtattgaggttggtctggtgtcaccagtgtgaaacctggtgacagggctgcagttgaagctacgtccattgctccg  
acagatcgcgctacaaagacacggctgccagacctcgggctctgtatggcctgcaagagcggatctccaaactgctgtgtgctgctga  
gcttctgcggttgggtggtgccagcggcgttttccgagtacgctgttacgggtgaggaccacatggtcaagctccagactcgattccc  
acgatatcggagcattggtgagcctattgctgttgcctggcatgctgtgaaacgcgctagattccagcctggccagacggcctggttctg  
gaggaggtcctatcgcccttgcaccattctgctctgcaaggccaccgtgccggcaaatgtgtgtccgagccggccttgattagaaga  
cagtttgcaaggaactggcgctgaagtgttgccttctacatgtgatgacgcaaatgccgttctcaaggctatggtgccggaaaacgaa

ggattccacgcagccttcgactgctctggaattcctcagacattcaccacctctattgtgccacagcccttcgggaatcgccgtcaacgtg  
gccatttggggagaccaccaattggattcatgccaatgtctctgacttaccaagagaaatagctaccggctccatgtgtacaccgtcaag  
gactccaggaagttgtcggggccttgaagatggtctcatatctttggacaaggcgcgaagatgattacaggcaaagtccacctaaggg  
acggagtcgagaagggctttagacagctcatcgacacaaggaaccaatgtcaagatcctggtgactccgaacgaggtgtcctagTTT  
AACGCTTCCTGGGAAGTGCAGCTCTTTTTTTACTCGCTGATATACATTTTAAATATTC  
TAGCAACTGTGTATGAAAACCTACGTACTTTTATACGGGAAACTAATAATGACTACA  
ATGATATTGAATACTGGCCGCTTCGAAGAGTGGTATAAAGTTTGTATCATTGCATTA  
AAAGAAAAGAAATATATGTCCCATCATCGCCAATCGCAATGTTGAATGGTCGTTTA  
CCACTTTTGGCGCTGGGCATATGCAGAAACATGCTGTCCCGTCCCCGACTGGCTAAA  
CTGCCATCTATAAGGTTTCGGTCTTTGGTCACCCCTTCTTCATCGCAGCTCATTCTC  
TCAGTCGGTTGTGTTAAAGGTCACCTGCAGTTGGAAAATCACTAATTTTACAAAGTT  
TTAGATGTAATTCATCCAAAACAGTTCAGAAACTTCTCTGCCTTCAGCCTCTCAGTI  
CGAGTTTATCATTATCAATACTGCCATTTCAAAGAATACGTAAATAATTAATAGTAG  
TGATTTTCCTAACTTTATTTAGTCAAAAAATTAGCCTTTTAATTCTGCTGTAACCCGT  
ACATGCCCAAATAGGGGGCGGGTTACACAGAATATATAACATCGTAGGTGTCTGG  
GTGAACAGTTTATTCCTGGCATCCACTAAATATAATGGAGCCCGCTTTTTAAGCTGG  
CATCCAGAAAAAAAAGAATCCAGCACCAAAATATTGTTTTCTTACCAACCATCA  
GTTTCATAGGTCCATTCTTTAGCGCAACTACAGAGAACAGGGGGCACAAACAGGCAA  
AAAACGGGCACAACCTCAATGGAGTGATGCAACCTGCCTGGAGTAAATGATGACAC  
AAGGCAATTGACCCACGCATGTATCTATCTCATTCTTACACCTTCTATTACCTTCT  
GCTCTCTGATTTGGAAAAAGCTGAAAAAAAAGGTTGAAACCAGTTCCCTGAAATT  
ATTCCCCTACTTGACTAATAAGTATATAAAGACGGTAGGTATTGATTGTAATTCTGT  
AAATCTATTTCTTAAACTTCTTAAATTCTACTTTTATAGTTAGTCTTTTTTTTAGTTTT  
AAAACACCAAGAACTTAGTTTCGAATAAAACACACATAAAACAAACAAAatgtccgctaaatcg  
ttgaagtcacagatccagtcattcaagctcaagggttgccttgcctaccctccattacgctgctcctgaagaaaaattctctcag  
aaagaccgattccgacaagatcgcattaattctggtggtgtagtgacatgaacctacacagccggttcattggtgaagggtatgtagt  
ggcgcctggttgccgaaattttgcatcccctcaacaaaacagatttaaatgcaatccgttagtcaatgaaatgctctggcgtttattg  
attgtgaagaactacaggtgatgtttgcatttggtctgctcctgagagagcaagagccttgggtattaactgccgcttctgctcatagg  
tgatgatgttcagttggcagagaaaaggggtggtatggttgtagaagagcattggcaggtaccgtttggtcataagatttaggtgcctc  
gcagaagaatattctagtaagatggcttagacggtacagctaaagtggctaaaattatcaacgacaatttgggtgaccattggatctctttaga  
ccattgtaaagttcctggcaggaaattcgaagtgaaatgaataaacgaaaaacaatggaattgggtatgggtattcataacgaacctggtgtaa  
agtttagaccctattccttaccgaagactgtatctcaagtatatgctacaaaactattggatccaaacgataaggatagagctttgtaaa  
gtttgatgaagatgatgaagttgctttagttaacaatctcggcgggttttaattttgttattgctatcacttcaaaaactacggattcttaa  
aggaaaattacaacataaccccgggtcaacaattgctggcacattgatgacctcctcaatggtaatgggttcagtatcacactactaaacgc  
cactaaggctacaaaggcttgaatctgattttgaggagatcaaatcagtagactgttgaacgatttacgaacgcaccgggctggcc  
aattgcagattttgaaaagactctgccccatctgtaacgatgactgttacataatgaagtaacagcaaaggccgtcggtacatgactttg  
acaagttgctgagtgatgaagagtggtgctgaacaagtatcaagagcgaaccgacattacggaactagacaatcaagttggtgatgt  
gattgtggttacacttttagtgagagttaaaggcatcaccgaaaacctgacaagctgtcgaaggactcattatctcagcgggtgccc  
aattcagatttcattgaaggctcaatgggaggtactctggtggttatattctttgtcgggttttcacacggattaattcaggtttgtaaac  
aaaggatgaaccctcactaaggaaattgtggctaagtcactcgggaattgattgatactttatacaaatatacaaaaggcaaggaaggat

catccaccatgattgatgctttagaaccattcgttaaagaattactgcatctaaggatttcaataaggcggtaaaagctgcagaggaaggtgc  
taaatccactgctacattcaggccaattggcagagcttcgtatgctggcgattcatctcaagtagaagatcctggcagtaggcctatgt  
gagttttgaagggggttcaaagcgcctttaaTAAAGTAAGAGCGCTACATTGGTCTACCTTTTTCTTTT  
ACTTAAACATTAGTTAGTTCGTTTTCTTTTTCTTTTTTTATGTTTCCCCCCCCAAAGTTC  
TGATTTTATAATATTTTATTTACACAATTCCATTTAACAGAGGGGGAATAGATTCTT  
TAGCTTAGAAAATTAGTGATCAATATATAATTGCTTTCTTTTCATCATAACAATACT  
GACAGTACTAAATAATTGCCTACTTGGCTTCACATACGTTGCATACGTCGATATAGA  
TAATAATGATAATGACAGCAGGATTATCGTAATACGTAATAGTTGAAAATCTCAA  
AATGTGTGGGTCATTACGTAAATAATGATAGGAATGGGATTCTTCTATTTTTCTTTT  
TCCATTCTAGCAGCCGTCGGGAAAACGTGGCATCCTCTCTTTCGGGCTCAATTGGAG  
TCACGCTGCCGTGAGCATCCTCTCTTCCATATCTAACAACACTGAGCACGTAACCAAT  
GGAAAAGCATGAGCTTAGCGTTGCTCCAAAAAAGTATTGGATGGTTAATACCATTG  
TCTGTTCTCTTCTGACTTTGACTCCTCAAAAAAAAAAATCTACAATCAACAGATCG  
CTTCAATTACGCCCTCACAAAACACTTTTTCTTCTTTCGCCACGTTAAATTTTAT  
CCCTCATGTTGTCTAACGGATTCTGCACTTGATTTATTATAAAAAGACAAAGACAT  
AATACTTCTCTATCAATTTAGTTATTGTTCTTCTTGGCTTATTCTTCTGTTCTTCTT  
TTCTTTTGTATATATAACCATAACCAAGTAATACATATTCAAatggctagaactttcttgcggt  
ggtaac<sup>tt</sup>taaat<sup>aa</sup>acgggtccaacaatccattaag<sup>aa</sup>attgtt<sup>aa</sup>agattgaactgcttctatcccagaaaatgctgaagttgtatct  
gtctccagctactacttagactactctgtctcttggtaagaagccacaagtcactgctgggtctcaaacgcctactggaaggtctggt  
gctttaccggtgaaaactccgttgacc<sup>aa</sup>atcaaggatgttgggtgtaagtgggtattttgggtcactccgaaagaagatctactccacga  
agatgacaagttcattgctgacaagaccagttcgcttaggtcaaggtgctgggtgcatcttgtgtatcgggtgaaactttggaagaaaagaag  
gccggt<sup>aa</sup>agactttgatgtt<sup>gt</sup>gaaagacaattgaacgctgcttgaagaagttaaggactggactaacgctggtgcttacgaacca  
gtctgggccattggtaccggttggctgctactccagaagatgctcaagatattcacgctccatcagaaagtcttggctccaagttgggtga  
caaggctgccagcgaattgagaatcttatacgggtggtccgctaacggtagcaacgccgttacctcaaggacaaggctgatgctgatggtt  
cttggctgggtggtgcttcttgaagccagaattgttgatatac<sup>ca</sup>actctagaaactaaGTGAATTTACTTTAAATCTTGC  
ATTTAAATAAAATTTCTTTTTATAGCTTTATGACTTAGTTTCAATTTATATACTATTTT  
AATGACATTTTCGATTCATTGATTGAAAGCTTTGTGTTTTTCTTGATGCGCTATTGC  
ATTGTTCTTGTCTTTTTTCGCCACATGTAATATCTGTAGTAGATACCTGATACATTGTG  
GATGCTGAGTGAAATTTAGTTAATAATGGAGGCGCTCTTAATAATTTTGGGGATAT  
TGGCTTTTTTTTTTAAAGTTTACAAATGAATTTTTTCCGCCAGGATAACGATTCTGAA  
GTTACTCTTAGCGTTCCTATCGGTACAGCCATCAAATCATGCCTATAAATCATGCCTA  
TATTTGCGTGCAGTCAGTATCATCTACATGAAAAAACTCCCGCAATTTCTTATAGA  
ATACGTTGAAAATTAATGTACGCGCCAAGATAAGATAACATATATCTAGATGCAG  
TAATATACACAGATTTCCGCGGACGTGGGAAGGAAAAAATTAGATAACAAAATCTG  
AGTGATATGGAAATTCGCTGTATAGCTCATATCTTCCCTTCAACATAAATAATTTT  
TATTAACAATGTAATTTCCATAATTTTATATTCCTCTCCACCCGGG
